## **A phosphoproteomic approach reveals that PKD3 controls phenylalanine and tyrosine metabolism**

Alexander E. Mayer<sup>1,\*</sup>, Angel Loza-Valdes<sup>1,2,\*</sup>, Werner Schmitz<sup>3</sup>, Jonathan Trujillo Viera<sup>1</sup>, Michael Leitges<sup>4</sup>, Andreas Schlosser<sup>1</sup>, & Grzegorz Sumara<sup>1,2,§</sup>

<sup>1</sup>Rudolf Virchow Center, Center for Integrative and Translational Bioimaging, University of Würzburg, 97080 Würzburg, Germany.

<sup>2</sup>Nencki Institute of Experimental Biology, Polish Academy of Sciences, 3 Pasteur Street, 02-093 Warsaw, Poland

<sup>3</sup>Theodor Boveri Institute, Biocenter, University of Würzburg, 97074 Würzburg, Germany.

<sup>4</sup>Tier 1, Canada Research Chair in Cell Signaling and Translational Medicine, Division of BioMedical Sciences / Faculty of Medicine, Craig L Dobbin Genetics Research Centre, Memorial University of Newfoundland, Health Science Centre 300 Prince Philip Drive, St. John`s, Newfoundland, Canada A1B 3V6

\*These authors contributed equally.

§ Correspondence should be addressed to Grzegorz Sumara - Nencki Institute of Experimental Biology, Polish Academy of Sciences, 3 Pasteur Street, 02-093 Warsaw, Poland, email: [g.sumara@nencki.edu.pl](mailto:g.sumara@nencki.edu.pl)

## Summary

Members of the Protein Kinase D (PKD) family (PKD1, 2, and 3) integrate hormonal and nutritional inputs to regulate complex cellular metabolism. Despite the fact that a number of functions have been annotated to particular PKDs, their molecular targets are relatively poorly explored. PKD3 promotes insulin sensitivity and suppresses lipogenesis in the liver. However, its substrates are largely unknown. Here we applied proteomic approaches to determine PKD3 targets. We identified over three-hundred putative targets of PKD3. Among them phenylalanine hydroxylase (PAH). PAH catalyses the conversion of phenylalanine to tyrosine and its activity is regulated by, phenylalanine concentration and glucagon-induced signaling. Consistently, we showed that PKD3 is activated by glucagon and promotes tyrosine levels in primary hepatocytes and liver of mice.

Taken together, our comprehensive proteomic approach established that PKD3 determine the rate of phenylalanine to tyrosine conversion in the liver. Therefore, our data indicate that PKD3 might play a role in development of diseases related to the defective tyrosine and phenylalanine metabolism.

**Key words:** Protein Kinase D3 (PKD3), phenylalanine hydroxylase (PAH), phenylalanine (Phe), tyrosine (Tyr), Phenylketonuria (PKU), Hepatocytes, Glucagon

## Introduction

Protein Kinase D (PKD) family members integrate multiple hormonal and metabolic signals to coordinate homeostasis of the organism (Kolczynska, Loza-Valdes et al., 2020, Löffler, Mayer et al., 2018, Mayer, Löffler et al., 2019, Rozengurt, 2011, Sumara, Formentini et al., 2009). The family of PKDs comprises three kinases: PKD1, PKD2, and PKD3 (Fu & Rubin, 2011, Rozengurt, 2011). PKDs share a basic structure composed of the cysteine-rich domain (CRD), essential for their affinity for their main activators phorbol esters and diacylglycerol (DAG). The pleckstrin homology domain (PH) and the c-terminal region determine the catalytic activity (Iglesias, Matthews et al., 1998, Rozengurt, Sinnett-Smith et al., 1997). PKD1 and PKD2 share the highest homology, while PKD3 kinase is the unique member of the family. PKD1 and PKD2 have been widely studied in different cellular processes such as trans-Golgi network dynamics, cell proliferation and cell migration, adipocytes function, insulin secretion as well as regulation of innate and adaptive immune cells function (Gehart, Goginashvili et al., 2012, Goginashvili, Zhang et al., 2015, Ittner, Block et al., 2012, Kolczynska et al., 2020, Löffler et al., 2018, Mayer et al., 2019, Rozengurt, 2011, Sumara et al., 2009, Zhang, Meszaros et al., 2017). The specific functions of PKD3 are still relatively unexplored. PKD3 has been implicated in tumor progression and invasiveness in breast and gastric cancers, as well as hepatocellular carcinoma (Huck, Duss et al., 2014, Yang, Xu et al., 2017, Zhang, Zhang et al., 2019). Furthermore, recent research has demonstrated that PKD3 regulates insulin sensitivity, lipid accumulation, and fibrogenesis in the liver (Mayer et al., 2019, Zhang, Liu et al., 2020). Thus, PKD3 plays a role in a wide range of cellular processes in both physiological and pathological conditions.

To date, only a few downstream targets of PKD3 have been identified. PKD3 phosphorylates G-protein-coupled receptor kinase-interacting protein 1 (GIT1) on serine 46 to regulate the localization of GIT1-paxilin complex and consequently cell shape and motility (Huck, Kemkemer et al., 2012). Moreover, ectopic expression of a constitutive active form of PKD3

(PKD3ca) in TNBC (triple-negative breast cancer cells) leads to hyperphosphorylation of S6 Kinase 1 (S6K1), a downstream target of the mechanistic target of rapamycin complex 1 (mTORC1), which is an energy sensor in the cell and sustains cell proliferation (Huck et al., 2014, Laplante & Sabatini, 2012). PKD3 also phosphorylates p65 at serine 536, a critical step for the upregulation of 6-phosphofructo-2-kinase/fructose-2,6-biphosphatase 3 (PFKFB3) and drives glycolysis in gastric cancer cells (Zhang et al., 2019). In addition, gain and loss of function studies suggest that PKD3 regulates the ERK1-MYC axis and promotes cell proliferation in cancer (Chen, Deng et al., 2008, Liu, Song et al., 2019). Finally, in hepatocytes, PKD3 suppresses insulin-dependent AKT and mTORC1/2 activation, which results in peripheral glucose intolerance and suppression of the hepatic lipid production (Mayer et al., 2019). Nevertheless, the PKD3 targets in the liver and other organs remain largely unexplored.

The liver has a major role in the regulation of glucose, lipid, and amino acids (AAs) homeostasis by regulating the adaptation to nutrient availability. In the liver, AAs are utilized to synthesize proteins and precursors for different bioactive molecules. Moreover, ammonia, a by-product of protein catabolism, is disposed as urea by the liver (Bröer & Bröer, 2017, Waterlow, 1999). Under certain physiological conditions such as fasting, the liver can utilize AAs to produce glucose or ketone bodies. This metabolic response is hormonally regulated by glucagon, which is released from the pancreatic alpha cells (Holst, Albrechtsen et al., 2017, Petersen, Vatner et al., 2017).

Phenylalanine (Phe) is an essential AA in mammals, and its conversion into tyrosine (Tyr) is crucial for the production of thyroid hormones and catecholamines. The conversion into tyrosine is tightly regulated by the enzyme phenylalanine hydroxylase (PAH), an enzyme that requires tetrahydrobiopterin (BH<sub>4</sub>) as a cofactor, and molecular dioxygen as a substrate (Fitzpatrick, 1999, Kaufman, 1958). Mutations in PAH lead to phenylketonuria (PKU), an abnormal accumulation of Phe in peripheral tissues (Konecki & Lichter-Konecki, 1991,



Scriver, 2007, Williams, Mamotte et al., 2008). Of note, the expression of PAH is restricted to the liver and kidney, major organs involved in AAs metabolism (Hsieh & Berry, 1979). PAH activity is regulated allosterically by high intracellular levels of Phe and hormonally by glucagon and insulin. By contrast, it was recently shown that oxygen concentrations might affect PAH activity in hepatocytes due to oxygen zonation (Donlon & Kaufman, 1978b, Kaufman, 1958, Ying, Pey et al., 2010). Upon fasting, glucagon rewires liver metabolism and promotes AAs catabolism. Glucagon leads to an increase in cAMP (cyclic Adenosine Monophosphate) and activates protein kinase A (PKA), which phosphorylates PAH at serine 16 to promote its function and increase the rate of Phe to Tyr conversion (Miranda, Teigen et al., 2002).

Here we carried out a phosphoproteomic study to investigate phosphorylation events dependent on PKD3 and thus to identify putative PKD3 targets in the liver. We found over three hundred of putative substrates of PKD3, among them PAH. Consistently, in mice and primary hepatocytes overexpressing constitutive active form of PKD3 (PKD3ca), Tyr levels were elevated, while the deletion of PKD3 resulted in decreased conversion of Phe to Tyr. Moreover, we showed that glucagon signaling promotes PKD3 activation and PAH activity in hepatocytes. Finally, PKD3 is required for glucagon-induced Phe to Tyr conversion. Taken together, we have identified potential PKD3-specific substrates in hepatocytes and uncovered the function of PKD3 in the regulation of Phe and Tyr metabolism.

## **RESULTS**

### **Unraveling putative targets of PKD3 in hepatocytes using substrate motif-specific antibodies**

Previous research has delineated the role of PKD3 in the regulation of hepatic glucose and lipid metabolism (Mayer et al., 2019). However, the phosphorylation targets of PKD3 in the liver remain elusive. To unravel the putative targets of PKD3 in the liver we have utilized

primary hepatocytes derived from PKD3 knockout mice and transduced these cells with adenovirus to overexpress either EGFP or PKD3ca (Fig. 1A). Subsequently, protein lysates were isolated, and used for pull-down assays. For this, we utilized PKD substrate motif specific antibodies. PKD kinases recognize the consensus AAs motif sequence LxRxx[S\*/T\*] (where L – leucine, R – arginine, S – serine, T – threonine, and x – any AA) within their putative targets (Döppler, Storz et al., 2005, Franz-Wachtel, Eisler et al., 2012). Importantly, the arginine (R) in position -3 in relation to the phospho-acceptor is essential, whereas leucine (L) in -5 position might be in some cases replaced by other amino acids e.g. valine (V) or isoleucine (I) (Döppler et al., 2005). At first, phospho-(Ser/Thr) PKD substrate LxRxx[S\*/T\*] antibody was used for immunoprecipitation to enrich proteins that have a phosphorylated PKD motif in lysates from primary hepatocytes deficient for PKD3 expressing either EGFP control or PKD3ca (Fig. 1A). Overexpression of PKD3ca showed an increase in proteins with a PKD motif (Fig. 1B). Proteins with phosphorylated PKD motif were immunoprecipitated and characterized by mass spectrometry. 84 proteins were significantly enriched (significance of 1 or 2) in lysates from PKD3ca hepatocytes compared to the EGFP ones (Fig. 1C, D and Supplementary table 1). The protein with highest enrichment induced by PKD3ca was PKD3 itself, suggesting that PKD3 might be subjected to auto-phosphorylation. Although leucine in -5 position is frequently present in PKD motifs, other targets also have valine (V) or isoleucine (I) in -5 position (Döppler et al., 2005). Therefore, to complement our approach, we performed a similar experiment utilizing an antibody only partially specific for PKD motif Rxx[S\*/T\*]. Overexpression of PKD3ca led to an increase in proteins that have a phosphorylated Rxx[S\*/T\*] motif (Fig. 2A). Subsequently, proteins were immunoprecipitated, identified and quantified by mass spectrometry. 226 proteins were significantly enriched (significance of 1 or 2) in lysates from PKD3ca hepatocytes compared to the EGFP expressing ones (Fig. 2B, C and Supplementary table 3). Of note, using antibody against motif Rxx[S\*/T\*] we identified almost three times more putative targets of PKD3

compared to antibody against LxRxx[S\*/T\*] motif, suggesting that PKD3 can frequently phosphorylate imperfect consensus site.

### **Comparative analysis of putative PKD3 targets identified using antibodies against LxRxx[S\*/T\*] and Rxx[S\*/T\*] motifs**

Our mass spectrometry screening identified 84 and 226 proteins significantly enriched using antibodies against LxRxx[S\*/T\*] and Rxx[S\*/T\*], respectively (Fig. 3A). Of note, 24 proteins were enriched in both screenings (Fig. 3A and C). In silico analysis revealed that 55% of proteins identified using antibody against LxRxx[S\*/T\*] motif, have at least one putative PKD consensus site resembling the sequence [L/V/I]xRxx[S\*/T\*]. Similarly, also 55% of proteins enriched from hepatocytes expressing PKD3ca using antibody against Rxx[S\*/T\*] had at least one [L/V/I]xRxx[S\*/T\*] motif in their sequence (Fig. 3B). 12 of the proteins which had in their sequence a [L/V/I]xRxx[S\*/T\*] motif, were enriched using both antibodies, against Rxx[S\*/T\*] and LxRxx[S\*/T\*] (Fig. 3B). In silico analysis also revealed that these 12 proteins have in total 30 putative PKD motifs. Further analysis of the 30 putative PKD motifs carried out in phosphosite.org repository showed that 11 sites of the motifs were previously reported. Noteworthy, 3 of the motifs were identified in the field of PKDs (also PKA signaling), namely LsRklS16 for phenylalanine hydroxylase (PAH), and LtRqkS3894 as well as LtRqlS5407 for dystonin (DST) (Fig. 3D). Moreover, a prediction tool for biological processes (ARCHS4) suggests that PKD3 signaling might influence catabolic and metabolic activity of PAH (Fig. 3E). PAH converts Phe to Tyr (Kaufman, 1958), therefore these data suggest that PKD3 might also regulate AAs metabolism in liver.

### **PKD3 signaling determines tyrosine levels in liver**

To test whether PKD3 regulates PAH phosphorylation in hepatocytes, we transduced primary hepatocytes with increasing amounts of adenoviruses expressing either EGFP or PKD3ca. Subsequently, protein lysates were used to evaluate PAH migration on the SDS PAGE

followed by Western blotting. Interestingly, overexpression of PKDca leads to an upshift of PAH signal and appearance of the second band, which is specific for this protein. Interestingly, the upshift of PAH was more pronounced when hepatocytes were transduced with an increasing amount of PKD3ca (Fig. 4A). Furthermore, to explore the physiological role of PKD3 in Phe metabolism, we cultivated hepatocytes expressing either EGFP or PKD3ca in the medium deprived of Phe and Tyr. Following Phe/Tyr starvation, we supplemented the cell culture medium of hepatocytes with increasing amounts of Phe and determined the tyrosine levels in the cells. In the cells, which were not supplemented with Phe, expression of PKD3ca resulted in the most pronounced increase in Tyr levels compared to control hepatocytes. Supplementation of Phe in the medium resulted in increased concentrations of Tyr levels in control hepatocytes. However, at each of the tested conditions, Tyr levels were significantly higher in the cells expressing PKD3ca but not increasing further upon addition of Phe (Fig. 4B). This suggests that PKD3 promotes the conversion of Phe to Tyr in hepatocytes. To test whether PKD3 regulates levels of Tyr in the complex in vivo situation, we measured Tyr levels in mice expressing PKD3ca specifically in hepatocytes (Mayer et al., 2019). Of note, mice overexpressing PKD3ca presented higher levels of Tyr in hepatic extracts than corresponding control animals (Fig. 4C). Moreover, as revealed by metabolomics analysis, mice overexpressing PKD3ca presented also higher Tyr to Phe ratio compared to control animals, while the levels of other AAs were not altered (Fig. 4D and Supplementary table 2). Altogether, these results suggest that PKD3 has a key role in the conversion of Phe into Tyr in the liver.

### **A glucagon-PKD3 axis determines amino acid metabolism in the liver**

Seminal papers in the early 1970s demonstrated that hepatic PAH activity is hormonally regulated by glucagon via PKA signaling (Abita, Milstien et al., 1976a, Donlon & Kaufman, 1978b). PKA phosphorylates Ser16 of PAH upon glucagon stimulation, which increases the

affinity of PAH for its main substrate, the amino acid Phe (Miranda et al., 2002). In addition, glucagon promotes formation of DAG, a well-known activator of PKD3 (Hermsdorf, Dettmer et al., 1989, L Rodgers, 2012). Glucagon is a classical hormone induced under fasting conditions that rewires metabolism in the liver primarily via PKA (Pilkis, Claus et al., 1988, Pilkis & Granner, 1992). Thus, in order to investigate whether glucagon also governs PKD activity and AAs metabolism, we starved primary hepatocytes from all AA for one hour, then cultured them in media containing either no amino acids (w/o AA), all amino acids (AA), all amino acids except Phe and Tyr (w/o Phe, Tyr), Phe exclusively, or Phe and Tyr exclusively for additional hour and stimulated them with glucagon for 5 or 20 minutes. Glucagon promotes phosphorylation of PKD3-Ser731/735 independent of amino acid stimulation. In addition, stimulation of primary hepatocytes with all AAs or with all AA except Phe and Tyr was sufficient to activate S6K-Thr389 as well as 4E-BP1-Thr37/46 and Ser65, which was reduced upon glucagon stimulation in a time-dependent manner after 5 and 20 min (Fig. 5A). Importantly, similarly to cells expressing PKD3ca, stimulation of hepatocytes with glucagon resulted in an upshift of PAH on the Western blot, probably resembling increased phosphorylation of this enzyme (Fig. 5A). All of these suggest that PKD3 might be required for glucagon-induced conversion of Phe to Tyr. Indeed, stimulation of primary control hepatocytes with glucagon resulted in increased Tyr levels, but in the cells-derived from PKD3-deficient mice, glucagon failed to increase Tyr levels (Fig. 5B). All of these data suggest that activation of PKD3 by glucagon is required for induction of Phe to Tyr conversion.

## **Discussion**

Recent studies established PKD3 function in the regulation of hepatic lipid and glucose metabolism (Mayer et al., 2019). However, the direct targets of PKD3 in hepatic cells remained elusive. Utilizing proteomic approach on primary hepatocytes deficient for PKD3

and re-expressing PKD3ca we identified over three-hundred putative targets of PKD3. Importantly, this approach resulted in the identification of the novel function of PKD3 in the regulation of hepatic metabolism of AAs. Namely, we showed that PKD3 promotes the conversion of Phe to Tyr by activating PAH, a rate-limiting enzyme in this process.

In our studies, we utilized two complementary proteomic approaches. For pull-downs, we used two antibodies: against the full phospho-motif sequence of PKD LxRxx[S\*/T\*] and antibody against part of the PKD phospho-motif sequence Rxx[S\*/T\*]. Importantly, pull-downs using an antibody against part of the PKD motif revealed more of the potential targets of PKD3 than antibody against full sequence targeted by PKDs. This indicates that in a large number of PKD3 target proteins AA at the position -5 in relation to the phospho-acceptor AA might be other than leucine. Whether we used for pull-downs antibody against LxRxx[S\*/T\*] or Rxx[S\*/T\*] motif, almost 50% of identified proteins did not present in their sequence the consensus motif for PKDs. These might indicate that in our pull-downs we have also fished out proteins, which are interacting with the targets of PKD3 but are not phosphorylated by PKD3 themselves.

In total, 12 proteins were identified by both pull-downs and possess one or more PKD phosphorylation motifs in their sequence. Among them, we found PAH as a target for PKD3, which we confirmed by classical WB. In line with our findings, a computational analysis to predict gene functions suggests that PKD3 might be involved in phenylalanine metabolism. PAH has two putative PKD motifs (LsRklS16 and IpRpS411). It was shown that Ser16 is phosphorylated upon glucagon stimulation via PKA activation (Abita, Milstien et al., 1976b, Donlon & Kaufman, 1978a). Furthermore, the classical PKA motif is RRx[S\*/T\*] and has in -2 position of Ser16 a lysine (K) and not arginine (R), which can also serve as a PKD motif (Pinna & Ruzzene, 1996). Therefore, it is plausible that glucagon also might affect hepatic PAH activity via PKD3 signaling leading to changes in Tyr concentration. Phosphorylation of

PAH on Ser16 increases the affinity of this enzyme to Phe (Arun, Kaddour-Djebbar et al., 2011, Doskeland, Martinez et al., 1996). Consistently, primary hepatocytes overexpressing PKD3ca presented higher levels of Tyr especially when cells were starved from Phe. Importantly, transgenic mice overexpressing PKD3ca had higher levels of Tyr in the liver as well as a higher Tyr to Phe ratio than littermate controls.

Canonical activation of PKA in the liver promotes amino acid catabolism (Holst et al., 2017). However, our findings suggest that glucagon also promotes the activation of PKD3 in primary hepatocytes independently of AA stimulation. Moreover, activation of PKD3 is required for the induction of conversion of Phe to Tyr by glucagon. All of these findings suggest that glucagon might act in liver also in a PKD3-dependent manner. Interestingly, our experiments provide a possible link between glucagon signaling and mTORC1 pathway since glucagon stimulation reduces drastically the activity of S6K-Thr389 as well as 4E-BP1-Thr37/46 and Ser65, which are crucial components of mTORC1.

As mentioned above, PKD3 regulates insulin signaling and lipogenesis in the liver by modulation of mTORC1, mTORC2, and AKT signaling (Mayer et al., 2019). Our current proteomic approach identified several potential targets of PKD3, which could explain the suppression of mTORC1, mTORC2, and AKT signaling by PKD3. For instance, Ral GTPase activating protein non-catalytic beta subunit (RalGAP $\beta$ ), which can control mTORC1 activity in response to insulin stimulation (Chen, Leto et al., 2011, Martin, Chen et al., 2014) was the most enriched protein in the Rxx[S\*/T\*]-motif antibody-based pull-down. Moreover, Tuberous sclerosis (TSC) 1 and 2, which also control mTORC1 and mTORC2 activity (Ben-Sahra & Manning, 2017), were also found using our strategy to be a putative target of PKD3. Interestingly, the distal downstream target of mTORC2, NDRG1, was also found to be a putative target of PKD3. Since previous studies showed that NDRG1 promotes lipogenesis (Cai, El-Merahbi et al., 2017), this might also explain PKD3-dependent lipogenesis in the

liver. However, these putative targets of PKD3 require confirmation and the detailed functions of PKD3-dependent phosphorylation needs to be identified.

In different cancer cell types, GIT1, S6K1 and PFKFB3 have been identified as targets of PKD3 (Huck et al., 2014, Huck et al., 2012, Laplante & Sabatini, 2012, Zhang et al., 2019). However, these proteins did not appear in our pull-downs. This might indicate that in hepatocytes PKD3 phosphorylates different set of the proteins that in respective cancer cell types.

In summary, in our study we identified a plethora of putative targets for PKD3 in the liver. Among them PAH, which suggests that PKD3 plays a role in AAs metabolism. We confirmed that PKD3 promotes the conversion of Phe to Tyr in response to the glucagon stimulation. Moreover, we have identified numerous putative targets, which might suggest the role of PKD3 in the regulation of lipid metabolism or in insulin-dependent signaling.



## **Materials and Methods**

### **Primary hepatocyte isolation, culture and infection**

Primary mouse hepatocytes were prepared as described previously (Mayer et al., 2019). All relevant mouse models of PKD3-deficiency or overexpression were also described in (Mayer et al., 2019). All animal studies were approved by the local animal welfare authorities (Regierung von Unterfranken) with the animal protocol no. AK55.2-2531.01-124/13. All mouse primary hepatocytes were infected 4 to 6 hours after plating with adenoviruses expressing either enhanced green fluorescent protein (EGFP) (Ad-EGFP) or a constitutively active form of PKD3 (Ad-mycPKD3ca) at a multiplicity of infection (MOI) of 10. Medium was replaced the following morning, and cells were used for experiments 36 to 48 hours after infection. Transduction efficiency, which was 100%, was assessed by analyzing the expression of the EGFP reporter (which was present in all adenoviruses).

### **Phenylalanine conversion assay**

Primary hepatocytes were fasted in DMEM without phenylalanine (Phe) and tyrosine (Tyr) for 1 h. Afterwards, cells were stimulated with either 0, 0.1 or 5 mM Phe for 1 h (500  $\mu$ L/well, 12-well plate). Next, the cells were lysed in 120  $\mu$ L lysis buffer followed by centrifugation at 10000g for 10 min at 4°C. Tyrosine was quantified using the Tyrosine Assay Kit (ABNOVA) according to the manufacturer's protocol.

### **Amino acids and glucagon stimulation**

Primary hepatocytes were fasted in DMEM without AAs for 1 h. Then they were cultured with either no amino acids, with all amino acids, all amino acids except Phe and Tyr, with Phe exclusively, or Phe and Tyr exclusively for 1 h. DMEM without AA and DMEM without Phe and Tyr were supplemented with respective amounts of glucose, serine, glycine, Phe, and Tyr. Hepatocytes were stimulated with glucagon for 0, 5, and 20 min.

### **Immunoprecipitation (IP) and Western blot (WB) analysis**

IP was performed on hepatocytes lysates using antibodies against LxRxx[S\*/T\*] and Rxx[S\*/T\*] phospho-motifs (both Cell Signaling) with Pierce Protein A/G Magnetic Beads according to the manufacturer's protocol. Briefly, 4 mg of protein (2 mg/mL) and 30 µg of antibody were used for each IP. Samples were eluted in 1x NuPAGE lithium dodecyl sulfate (LDS) sample buffer supplemented 60 mM DDT for 10 min at 95°C. Beads were magnetically separated from the immunoprecipitated product, which was further analyzed on WB or by Mass spectrometry.

### **Mass Spectrometry analysis**

Gel electrophoresis and in-gel digestion were carried out according to the standard procedures.

An Orbitrap Fusion equipped with a PicoView ion source and coupled to an EASY-nLC 1000 were used for NanoLC-MS/MS analyzes.

MS and MS/MS scans were both obtained using an Orbitrap analyzer. The raw data was processed, analyzed, and quantified using the MaxQuant software. *Label-free quantification* (LFQ) intensities were used for protein quantification. Proteins with less than two identified razor and unique peptides were excluded. Data imputation was performed with values from a standard normal distribution with a mean of the 5% quantile of the combined log<sub>10</sub>-transformed LFQ intensities and a standard deviation of 0.1. Log<sub>2</sub> transformed protein ratios of sample versus control with values outside a 1.5x (potential, significance 1) or 3x (extreme, significance 2) *interquartile range* (IQR), respectively, were considered as significantly enriched.

### **Metabolomics analysis (HPLC)**

For AAs analysis, pieces of mouse liver were homogenized in 69 vol. methanol/H<sub>2</sub>O (80/20, v/v) containing 3.5 µM lamivudine as external standard using an ultraturrax. The resulting

homogenate was centrifuged (2 min. max rpm) and 600  $\mu$ l supernatant was applied to an activated and equilibrated RP18 SPE-column (activation with 1 ml acetonitrile and equilibration with 1 ml methanol/H<sub>2</sub>O (80/20, v/v) (Phenomenex Strata C18-E, 55  $\mu$ m, 50 mg/1 ml, Phenomenex Aschaffenburg, Germany). The resulting eluate was evaporated at room temperature using a vacuum concentrator. The evaporated samples were re-dissolved in 100  $\mu$ l of 5 mM NH<sub>4</sub>OAc in acetonitrile/ H<sub>2</sub>O (25/75, v/v). The equipment used for LC/MS analysis was a Thermo Scientific Dionex Ultimate 3000 UHPLC system hyphenated with a Q Exactive mass spectrometer (QE-MS) equipped with a HESI probe (Thermo Scientific, Bremen, Germany). LC parameters: Mobile phase A consisted of 5 mM NH<sub>4</sub>OAc in acetonitrile/H<sub>2</sub>O (5/95, v/v), and mobile phase B consisted of 5 mM NH<sub>4</sub>OAc in acetonitrile/H<sub>2</sub>O (95/5, v/v). Chromatographic separation of AAs was achieved by applying 3  $\mu$ l of dissolved sample on a SeQuant ZIC-HILIC column (3.5  $\mu$ m particles, 100  $\times$  2.1 mm) (Merck, Darmstadt, Germany), combined with a Javelin particle filter (Thermo Scientific, Bremen, Germany) and a SeQuant ZIC-HILIC precolumn (5  $\mu$ m particles, 20  $\times$  2 mm) (Merck, Darmstadt, Germany) using a linear gradient of mobile phase A (5 mM NH<sub>4</sub>OAc in acetonitrile/H<sub>2</sub>O (5/95, v/v)) and mobile phase B (5 mM NH<sub>4</sub>OAc in acetonitrile/H<sub>2</sub>O (95/5, v/v)). The LC gradient program was 100% solvent B for 2 min, followed by a linear decrease to 40% solvent B within 16 min, then maintaining 40% B for 6 min, then returning to 100% B in 1 min and 5 min 100% solvent B for column equilibration before each injection. The column temperature was set to 30  $^{\circ}$ C, the flow rate was maintained at 200  $\mu$ L/min. The eluent was directed to the ESI source of the QE-MS from 1.85 min to 20.0 min after sample injection. MS Scan Parameters: Scan Type: Full MS, Scan Range: 69.0 - 1000 m/z, Resolution: 70,000, Polarity: Positive and Negative, alternating, AGC-Target: 3E6, Maximum Injection Time: 200 ms HESI Source Parameters: Sheath gas: 30, auxiliary gas: 10, sweep gas: 3, spray voltage: 2.5 kV in pos. mode and 3.6 kV in neg. mode, Capillary temperature: 320  $^{\circ}$ C, S-lens RF level: 55.0, Aux Gas Heater temperature: 120  $^{\circ}$ C. Data Evaluation: Peaks

corresponding to the calculated amino acid masses (MIM +/- H+ ± 2 mMU) were integrated using TraceFinder software (Thermo Scientific, Bremen, Germany). Alternatively, (for Fig. 4B and C and Fig. 5B) commercially available kit was used for Tyr quantification (Cell Biolabs - Biocat).

## ACKNOWLEDGMENTS

We thank Dr. Olga Sumara for critical reading of our manuscript. This study was funded by European Research Council (ERC) Starting Grant SicMetabol (no. 678119), Emmy Noether grant Su 820/1-1 from the German Research Foundation, EMBO Installation Grant from European Molecular Biology Organization (EMBO), and the Dioscuri Centre of Scientific Excellence. The program was initiated by the Max Planck Society (MPG), managed jointly with the National Science Centre and mutually funded by the Ministry of Science and Higher Education (MNiSW) and the German Federal Ministry of Education and Research (BMBF).

## REFERENCES

- Abita J-P, Milstien S, Chang N, Kaufman S (1976a) In vitro activation of rat liver phenylalanine hydroxylase by phosphorylation. *Journal of Biological Chemistry* 251: 5310-5314
- Abita JP, Milstien S, Chang N, Kaufman S (1976b) In vitro activation of rat liver phenylalanine hydroxylase by phosphorylation. *J Biol Chem* 251: 5310-4
- Arun SN, Kaddour-Djebbar I, Shapiro BA, Bollag WB (2011) Ultraviolet B irradiation and activation of protein kinase D in primary mouse epidermal keratinocytes. *Oncogene* 30: 1586-96
- Ben-Sahra I, Manning BD (2017) mTORC1 signaling and the metabolic control of cell growth. *Current opinion in cell biology* 45: 72-82
- Bröer S, Bröer A (2017) Amino acid homeostasis and signalling in mammalian cells and organisms. *Biochemical Journal* 474: 1935-1963
- Cai K, El-Merahbi R, Loeffler M, Mayer AE, Sumara G (2017) Ndr1 promotes adipocyte differentiation and sustains their function. *Scientific reports* 7: 1-9
- Chen J, Deng F, Singh SV, Wang QJ (2008) Protein kinase D3 (PKD3) contributes to prostate cancer cell growth and survival through a PKC $\epsilon$ /PKD3 pathway downstream of Akt and ERK 1/2. *Cancer research* 68: 3844-3853
- Chen X-W, Leto D, Xiong T, Yu G, Cheng A, Decker S, Saltiel AR (2011) A Ral GAP complex links PI 3-kinase/Akt signaling to RalA activation in insulin action. *Molecular biology of the cell* 22: 141-152
- Donlon J, Kaufman S (1978a) Glucagon stimulation of rat hepatic phenylalanine hydroxylase through phosphorylation in vivo. *J Biol Chem* 253: 6657-9
- Donlon J, Kaufman S (1978b) Glucagon stimulation of rat hepatic phenylalanine hydroxylase through phosphorylation in vivo. *Journal of Biological Chemistry* 253: 6657-6659
- Döppler H, Storz P, Li J, Comb MJ, Toker A (2005) A phosphorylation state-specific antibody recognizes Hsp27, a novel substrate of protein kinase D. *Journal of Biological Chemistry* 280: 15013-15019

- Doskeland AP, Martinez A, Knappskog PM, Flatmark T (1996) Phosphorylation of recombinant human phenylalanine hydroxylase: effect on catalytic activity, substrate activation and protection against non-specific cleavage of the fusion protein by restriction protease. *Biochem J* 313 ( Pt 2): 409-14
- Fitzpatrick PF (1999) Tetrahydropterin-dependent amino acid hydroxylases. *Annual review of biochemistry* 68: 355-381
- Franz-Wachtel M, Eisler SA, Krug K, Wahl S, Carpy A, Nordheim A, Pfizenmaier K, Hausser A, Macek B (2012) Global detection of protein kinase D-dependent phosphorylation events in nocodazole-treated human cells. *Molecular & Cellular Proteomics* 11: 160-170
- Fu Y, Rubin CS (2011) Protein kinase D: coupling extracellular stimuli to the regulation of cell physiology. *EMBO reports* 12: 785-796
- Gehart H, Goginashvili A, Beck R, Morvan J, Erbs E, Formentini I, De Matteis MA, Schwab Y, Wieland FT, Ricci R (2012) The BAR domain protein Arfaptin-1 controls secretory granule biogenesis at the trans-Golgi network. *Developmental cell* 23: 756-768
- Goginashvili A, Zhang Z, Erbs E, Spiegelhalter C, Kessler P, Mihlan M, Pasquier A, Krupina K, Schieber N, Cinque L (2015) Insulin secretory granules control autophagy in pancreatic  $\beta$  cells. *Science* 347: 878-882
- Hermsdorf T, Dettmer D, Hofmann E (1989) Age-dependent effects of phorbol ester on adenylate cyclase stimulation by glucagon in liver of female rats. *Biomedica biochimica acta* 48: 255-260
- Holst JJ, Albrechtsen NJW, Pedersen J, Knop FK (2017) Glucagon and amino acids are linked in a mutual feedback cycle: The liver- $\alpha$ -cell axis. *Diabetes* 66: 235-240
- Hsieh MC, Berry HK (1979) Distribution of phenylalanine hydroxylase (EC 1.14. 3.1) in liver and kidney of vertebrates. *Journal of Experimental Zoology* 208: 161-167
- Huck B, Duss S, Hausser A, Olayioye MA (2014) Elevated protein kinase D3 (PKD3) expression supports proliferation of triple-negative breast cancer cells and contributes to mTORC1-S6K1 pathway activation. *Journal of Biological Chemistry* 289: 3138-3147
- Huck B, Kemkemer R, Franz-Wachtel M, Macek B, Hausser A, Olayioye MA (2012) GIT1 phosphorylation on serine 46 by PKD3 regulates paxillin trafficking and cellular protrusive activity. *Journal of Biological Chemistry* 287: 34604-34613
- Iglesias T, Matthews S, Rozengurt E (1998) Dissimilar phorbol ester binding properties of the individual cysteine-rich motifs of protein kinase D. *FEBS letters* 437: 19-23
- Ittner A, Block H, Reichel CA, Varjosalo M, Gehart H, Sumara G, Gstaiger M, Krombach F, Zarbock A, Ricci R (2012) Regulation of PTEN activity by p38 $\delta$ -PKD1 signaling in neutrophils confers inflammatory responses in the lung. *Journal of Experimental Medicine* 209: 2229-2246
- Kaufman S (1958) A new cofactor required for the enzymatic conversion of phenylalanine to tyrosine. *Journal of Biological Chemistry* 230: 931-939
- Kolczynska K, Loza-Valdes A, Hawro I, Sumara G (2020) Diacylglycerol-evoked activation of PKC and PKD isoforms in regulation of glucose and lipid metabolism: a review. *Lipids in Health and Disease* 19: 1-15
- Konecki DS, Lichter-Konecki U (1991) The phenylketonuria locus: current knowledge about alleles and mutations of the phenylalanine hydroxylase gene in various populations. *Human genetics* 87: 377-388
- L Rodgers R (2012) Glucagon and cyclic AMP: time to turn the page? *Current diabetes reviews* 8: 362-381
- Laplanche M, Sabatini DM (2012) mTOR signaling in growth control and disease. *Cell* 149: 274-293
- Liu Y, Song H, Yu S, Huang KH, Ma X, Zhou Y, Yu S, Zhang J, Chen L (2019) Protein Kinase D3 promotes the cell proliferation by activating the ERK1/c-MYC axis in breast cancer. *Journal of Cellular and Molecular Medicine*
- Löffler MC, Mayer AE, Viera JT, Valdes AL, El-Merahbi R, Ade CP, Karwen T, Schmitz W, Slotta A, Erk M (2018) Protein kinase D1 deletion in adipocytes enhances energy dissipation and protects against adiposity. *The EMBO journal* 37
- Martin TD, Chen X-W, Kaplan RE, Saltiel AR, Walker CL, Reiner DJ, Der CJ (2014) Ral and Rheb GTPase activating proteins integrate mTOR and GTPase signaling in aging, autophagy, and tumor cell invasion. *Molecular cell* 53: 209-220

- Mayer AE, Löffler MC, Valdés AEL, Schmitz W, El-Merahbi R, Viera JT, Erk M, Zhang T, Braun U, Heikenwalder M (2019) The kinase PKD3 provides negative feedback on cholesterol and triglyceride synthesis by suppressing insulin signaling. *Science signaling* 12: eaav9150
- Miranda FF, Teigen K, Thórolfsson M, Svebak RM, Knappskog PM, Flatmark T, Martinez A (2002) Phosphorylation and Mutations of Ser16 in Human Phenylalanine Hydroxylase KINETIC AND STRUCTURAL EFFECTS. *Journal of Biological Chemistry* 277: 40937-40943
- Petersen MC, Vatner DF, Shulman GI (2017) Regulation of hepatic glucose metabolism in health and disease. *Nature reviews endocrinology* 13: 572
- Pilkis S, Claus T, El-Maghrabi MR (1988) The role of cyclic AMP in rapid and long-term regulation of gluconeogenesis and glycolysis. *Advances in second messenger and phosphoprotein research* 22: 175-191
- Pilkis SJ, Granner D (1992) Molecular physiology of the regulation of hepatic gluconeogenesis and glycolysis. *Annual review of physiology* 54: 885-909
- Pinna LA, Ruzzene M (1996) How do protein kinases recognize their substrates? *Biochim Biophys Acta* 1314: 191-225
- Rozengurt E (2011) Protein kinase D signaling: multiple biological functions in health and disease. *Physiology* 26: 23-33
- Rozengurt E, Sinnott-Smith J, Zugaza J (1997) Protein kinase D: a novel target for diacylglycerol and phorbol esters. In Portland Press Ltd.
- Scriver CR (2007) The PAH gene, phenylketonuria, and a paradigm shift. *Human mutation* 28: 831-845
- Sumara G, Formentini I, Collins S, Sumara I, Windak R, Bodenmiller B, Ramracheya R, Caille D, Jiang H, Platt KA (2009) Regulation of PKD by the MAPK p38 $\delta$  in insulin secretion and glucose homeostasis. *Cell* 136: 235-248
- Waterlow J (1999) The mysteries of nitrogen balance. *Nutrition research reviews* 12: 25-54
- Williams RA, Mamotte CD, Burnett JR (2008) Phenylketonuria: an inborn error of phenylalanine metabolism. *The Clinical Biochemist Reviews* 29: 31
- Yang H, Xu M, Chi X, Yan Q, Wang Y, Xu W, Zhuang K, Li A, Liu S (2017) Higher PKD3 expression in hepatocellular carcinoma (HCC) tissues predicts poorer prognosis for HCC patients. *Clinics and research in hepatology and gastroenterology* 41: 554-563
- Yefimenko I, Fresquet V, Marco-Marin C, Rubio V, Cervera J (2005) Understanding carbamoyl phosphate synthetase deficiency: impact of clinical mutations on enzyme functionality. *J Mol Biol* 349: 127-41
- Ying M, Pey AL, Aarsæther N, Martinez A (2010) Phenylalanine hydroxylase expression in primary rat hepatocytes is modulated by oxygen concentration. *Molecular genetics and metabolism* 101: 279-281
- Zhang J, Zhang Y, Wang J, Zhao Y, Ren H, Chu Y, Feng L, Wang C (2019) Protein kinase D3 promotes gastric cancer development through p65/6-phosphofructo-2-kinase/fructose-2, 6-biphosphatase 3 activation of glycolysis. *Experimental cell research* 380: 188-197
- Zhang S, Liu H, Yin M, Pei X, Hausser A, Ishikawa E, Yamasaki S, Jin ZG (2020) Deletion of Protein Kinase D3 Promotes Liver Fibrosis in Mice. *Hepatology*
- Zhang Z, Meszaros G, He W-t, Xu Y, de Fatima Magliarelli H, Maily L, Mihlan M, Liu Y, Puig Gámez M, Goginashvili A (2017) Protein kinase D at the Golgi controls NLRP3 inflammasome activation. *Journal of Experimental Medicine* 214: 2671-2693

## FIGURE LEGENDS

**Figure 1: Identification of PKD3 substrates by immunoprecipitation using PKD substrate motif antibody LxRxx[S\*/T\*].** (A) Experimental design. Primary hepatocytes isolated from PKD3-deficient mice were transduced by adenovirus containing EGFP (controls) or the constitutive active form of PKD3 (PKD3ca). IP with PKD-substrate motif antibodies was performed on cell extracts and followed by mass spectrometry analysis. (B) WB analysis of protein lysates from PKD3-deficient primary hepatocytes transduced with either adenovirus expressing control EGFP (Ad-EGFP) or constitutive active PKD3 (Ad-mycPKD3ca) using PKD-substrate motif LxRxx[S\*/T\*]-specific antibody (n=3 independent experiments). (C) Scatter plot of the statistical significance of log<sub>2</sub> transformed protein ratios versus log<sub>10</sub>-transformed LFQ intensities between control and PKD3ca expressing hepatocytes. Enriched proteins are indicated by red (2, significantly enriched) or green (1, potentially enriched) dots, blue ones are not enriched (0, not enriched). (D) 15 most enriched proteins identified by mass spectrometry showing number, UniProt accession number, gene names, protein names, peptide count in EGFP and PKD3ca samples, respectively, and log<sub>2</sub> transformed LFQ protein ratio are shown in the table.

**Figure 2: Identification of PKD3 targets in hepatocytes by IP with Rxx[S\*/T\*] antibody.** (A) WB using Rxx[S\*/T\*] motif antibody on lysates from PKD3-deficient hepatocytes expressing control EGFP (Ad-EGFP) or constitutive active form of PKD3 (Ad-mycPKD3ca). (B) Scatter plot of the statistical significance of log<sub>2</sub> transformed protein ratios versus log<sub>10</sub>-transformed LFQ intensities between control and PKD3ca expressing hepatocytes. Enriched proteins are indicated by red (2, significantly enriched) or green (1, potentially enriched) dots, blue ones are not enriched (0, not enriched). (C) 15 most enriched proteins identified by mass spectrometry in the experiment from C, showing number, UniProt accession number, gene names, protein names, peptide count in EGFP and PKD3ca samples, respectively, and log<sub>2</sub> transformed LFQ protein ratio.



**Figure 3: Comparative analysis of putative PKD3 targets identified using different motif antibodies.** (A) Venn diagram of common putative substrates that were significantly enriched by both antibodies LxRxx[S\*/T\*] and Rxx[S\*/T\*]. (B) Computational identification of putative PKD motifs [L/V/I]xRxx[S\*/T\*] among putative substrates identified by both antibodies (percentage of proteins possessing a putative motif in brackets). Results were obtained using ExPASy ScanProsite tool. (C) List of 24 proteins enriched by both antibodies, LxRxx[S\*/T\*] and Rxx[S\*/T\*] with UniProt accession numbers, gene and protein names, peptide count and log<sub>2</sub> transformed LFQ protein ratio for LxRxx[S\*/T\*] and Rxx[S\*/T\*] immunoprecipitations, respectively, and the amount of putative PKD motifs for each protein. (D) Flow of computational identification of putative PKD substrates by comparing the PKD motifs within proteins using phosphosite.org repository. (E) Prediction of biological processes potentially regulated by PKD3 using ARCHS<sup>4</sup>.

**Figure 4: PKD3 signaling controls PAH activity and determines cellular levels of Tyr.** (A) PAH expression and shifting analyzed in hepatocytes transduced with increasing amounts of adenovirus expressing EGFP or PKD3ca at indicated MOIs using WB. (B) Phe to Tyr conversion assay in primary hepatocytes expressing either EGFP or PKD3ca. Cells were depleted from Phe and Tyr in the medium for 1 h before stimulation and incubated with 0, 0.1, or 5 mM Phe for 1 h. (C) Tyr levels in livers from control mice and mice overexpressing PKD3ca (n=12 and n=16). (D) Tyr to Phe ratio in liver tissues from control mice and mice overexpressing PKD3ca (n=12 and n=16).

**Figure 5: A glucagon-PKD3 axis determines amino acids metabolism in the liver.** (A) WB analysis of indicated proteins in primary hepatocytes deprived from all AA for one hour, then cultured in media containing either no amino acids (w/o AA), all amino acids (AA), all amino acids except Phe and Tyr (w/o Phe, Tyr), Phe exclusively, or Phe and Tyr exclusively for additional hour and stimulated with glucagon for 5 or 20 minutes. (B) Intracellular phenylalanine to tyrosine conversion assay in primary hepatocytes isolated from control or



PKD3-deficient mice and stimulated with glucagon for 20 minutes. Data are presented as mean  $\pm$  SEM. \* $P > 0.05$ , \*\*\* $P > 0.001$  (one way ANOVA with post hoc Tukey's test).

Fig. 1

A

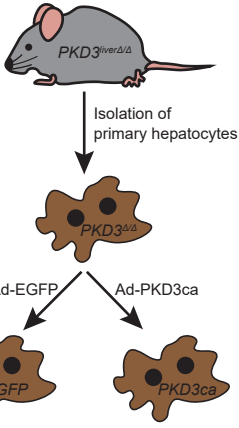

Immunoprecipitation with PKD-substrate motifs LxRxx[S\*/\*] Rxx[S\*/\*] antibodies

Mass spectrometry analysis

B

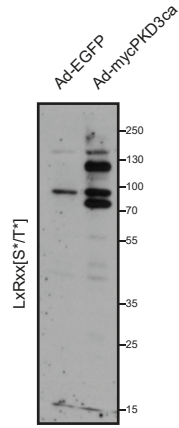

C

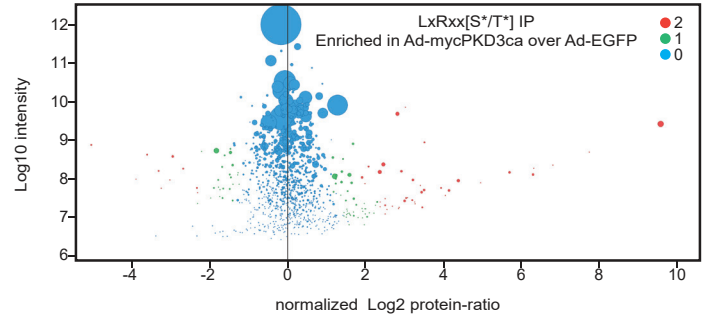

D

LxRxx[S\*/\*]

| No. | UniProt | Gene names | Protein names                                  | Peptides Ad-EGFP | Peptides Ad-PKD3ca | Normalized Log2 protein-ratio |
|-----|---------|------------|------------------------------------------------|------------------|--------------------|-------------------------------|
| 1   | Q5FWX6  | Prkd3      | Serine/threonine-protein kinase D3             | 0                | 46                 | 9.56                          |
| 2   | Q9JKP5  | Mbnl1      | Muscleblind-like protein1                      | 1                | 2                  | 7.73                          |
| 3   | Q3UIL6  | Plekha7    | Pleckstrin homology dom.-cont. fam. A member 7 | 1                | 3                  | 6.79                          |
| 4   | Q8QZS1  | Hibch      | 3-hydroxyisobutyryl-CoA hydrolase, mito.       | 1                | 3                  | 6.31                          |
| 5   | P97861  | Krt86      | Keratin, type II cuticular Hb6                 | 2                | 12                 | 6.29                          |
| 6   | Q6A0A2  | Larp4b     | La-related protein 4B                          | 1                | 13                 | 5.68                          |
| 7   | P62984  | Uba52      | Ubiquitin-60S ribosomal protein L40            | 9                | 6                  | 4.94                          |
| 8   | A2A7S8  | Kiaa1522   | Uncharacterized protein KIAA1522               | 3                | 20                 | 4.37                          |
| 9   | F8VQB6  | Myo10      | Unconventional myosin-X                        | 2                | 14                 | 4.13                          |
| 10  | Q8BHL4  | Gprc5a     | Retinoic acid-induced protein 3                | 0                | 2                  | 4.04                          |
| 11  | Q8K0Y2  | Krt33a     | Keratin, type I cuticular Ha3-l                | 2                | 6                  | 3.93                          |
| 12  | P11352  | Gpx1       | Glutathione peroxidase 1                       | 8                | 10                 | 3.50                          |
| 13  | QSSZ5   | Tns3       | Tensin-3                                       | 1                | 12                 | 3.50                          |
| 14  | Q05915  | Gch1       | GTP cyclohydrolase 1                           | 2                | 7                  | 3.45                          |
| 15  | Q3UJB9  | Edc4       | Enhancer of mRNA decapping protein 4           | 1                | 13                 | 3.44                          |

Fig. 2

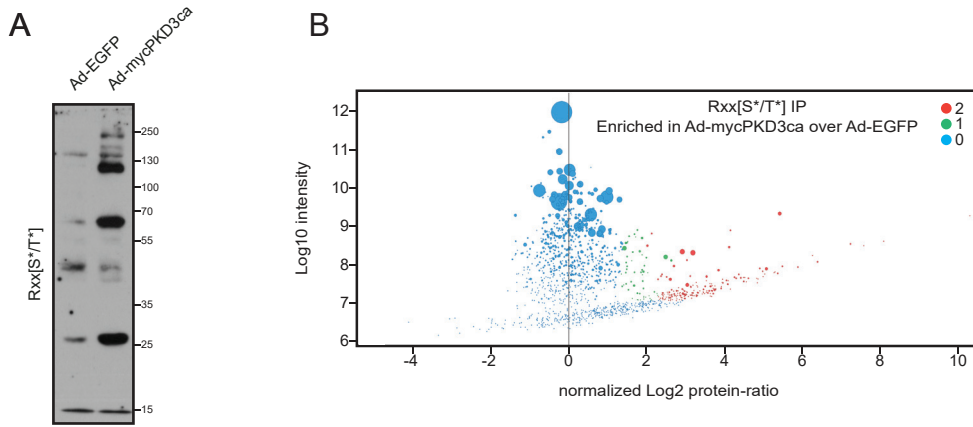

**C**

| Rxx[S* <sup>T</sup> /*] |         |            |                                            |                  |                    |                               |
|-------------------------|---------|------------|--------------------------------------------|------------------|--------------------|-------------------------------|
| No.                     | UniProt | Gene names | Protein names                              | Peptides Ad-EGFP | Peptides Ad-PKD3ca | Normalized Log2 protein-ratio |
| 1                       | Q8BQZ4  | Ralgapb    | Ral GTPase-activating protein subunit beta | 1                | 3                  | 10.24                         |
| 2                       | P63260  | Actg1      | Actin, cyto. 2                             | 48               | 44                 | 8.04                          |
| 3                       | Q9JKP5  | Mbnl1      | Muscleblind-like protein 1                 | 1                | 2                  | 7.53                          |
| 4                       | P35700  | Prdx1      | Peroxiredoxin-1                            | 3                | 11                 | 7.19                          |
| 5                       | K9J7B2  | Ugta6b     | UDP-glucuronosyltransferase                | 1                | 13                 | 6.35                          |
| 6                       | Q62426  | Cstb       | Cystatin-B                                 | 1                | 6                  | 6.22                          |
| 7                       | P70275  | Sema3e     | Semaphorin-3E                              | 1                | 14                 | 5.85                          |
| 8                       | Q62266  | Sprr1a     | Cornifin-A                                 | 2                | 9                  | 5.45                          |
| 9                       | Q5FWX6  | Prkd3      | Serine/threonine-protein kinase D3         | 3                | 42                 | 5.38                          |
| 10                      | P54823  | Ddx6       | Probable ATP-dependend RNA helicase DDX6   | 2                | 14                 | 5.33                          |
| 11                      | P63168  | Dynll1     | Dynein light chain 1, cyto.                | 0                | 3                  | 5.26                          |
| 12                      | P01887  | B2m        | Beta-2-microglobulin                       | 1                | 2                  | 5.24                          |
| 13                      | Q80TV8  | Clasp1     | CLIP-associating protein 1                 | 0                | 30                 | 5.04                          |
| 14                      | O54962  | Banf1      | barrier-to-autointegration factor          | 1                | 3                  | 5.00                          |
| 15                      | Q80U30  | Clec16a    | Protein CLEC16A                            | 1                | 2                  | 4.96                          |

Fig. 3

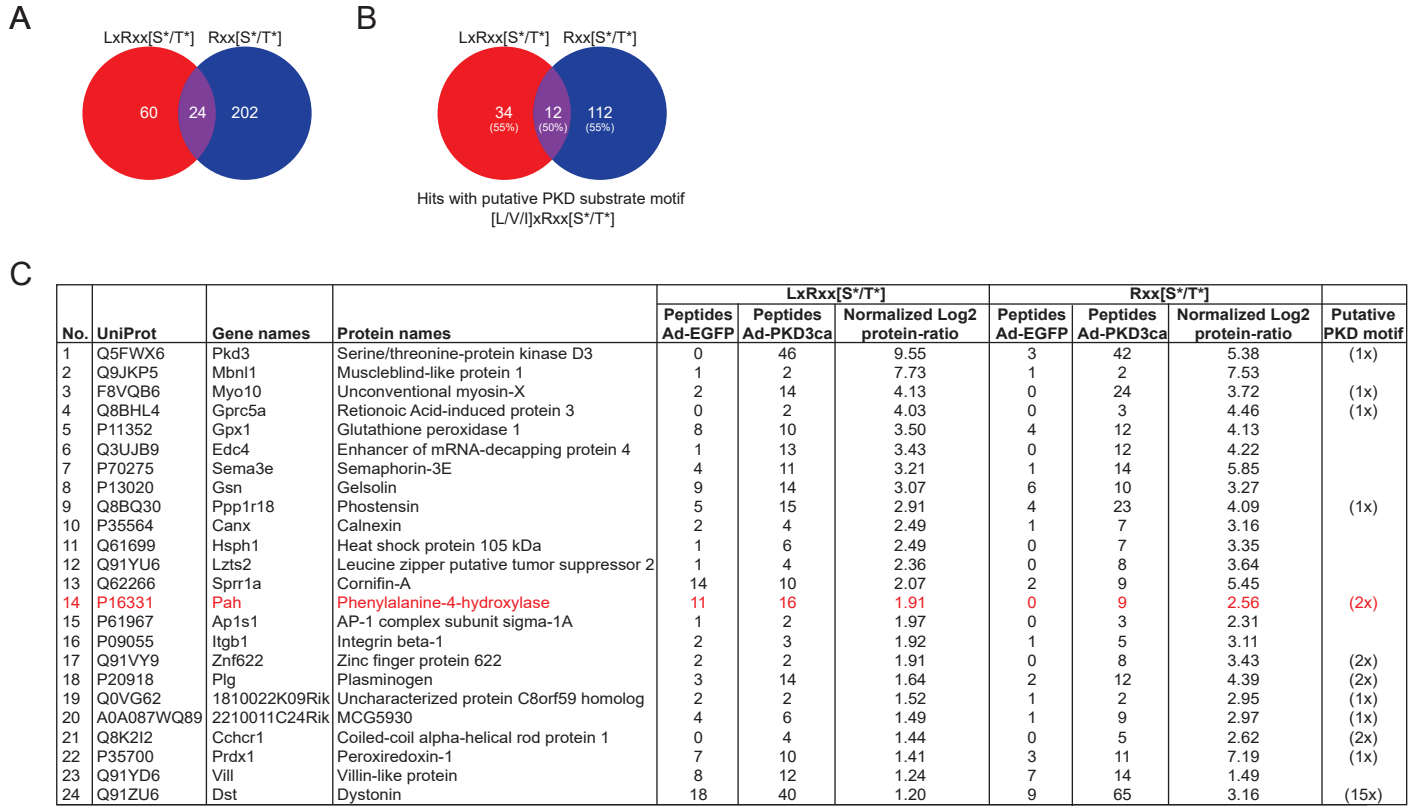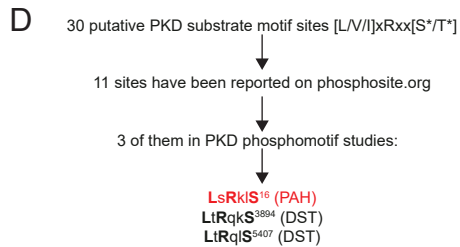

**E**

| ARCHS <sup>4</sup> prediction for biological processes |         |                                                                               |         |
|--------------------------------------------------------|---------|-------------------------------------------------------------------------------|---------|
| Rank                                                   | GO      | Protein names                                                                 | Z-score |
| 1                                                      | 0007506 | gonadal mesoderm development                                                  | 8.28    |
| 2                                                      | 1902222 | erythrose 4-phosphate/phosphoenolpyruvate family amino acid catabolic process | 7.30    |
| 3                                                      | 0006559 | L-phenylalanine catabolic process                                             | 7.30    |
| 4                                                      | 0051292 | nuclear pore complex assembly                                                 | 7.27    |
| 5                                                      | 0006558 | L-phenylalanine metabolic process                                             | 6.83    |

Fig. 4

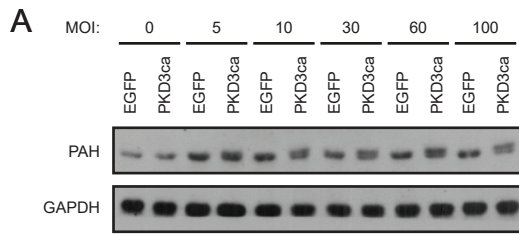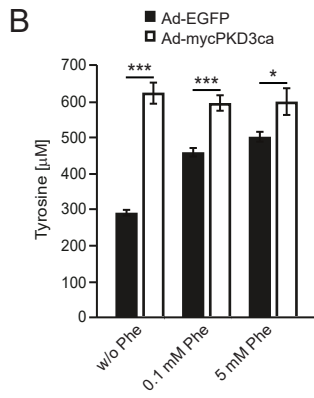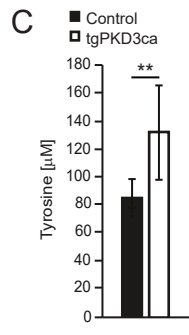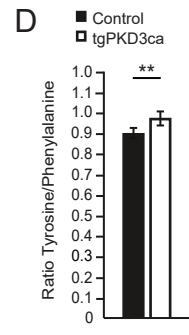

Fig. 5

A

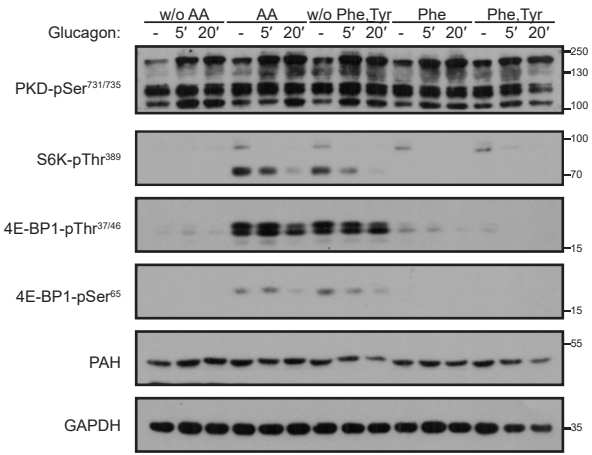

B

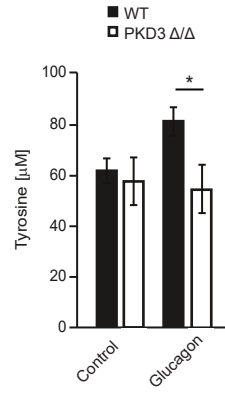

## Supplementary Table 1

### Proteins identified by MS from IP with LxRxx[S\*/T\*] antibody

| Uniprot entry | Protein names                                           | Gene names | Peptides EGFP | Peptides PKD3ca | norm.log2.Ratio. filt.LFQ.intensity | Sig. | Putative PKD substrate motifs                                                                                     |
|---------------|---------------------------------------------------------|------------|---------------|-----------------|-------------------------------------|------|-------------------------------------------------------------------------------------------------------------------|
| Q5FWX6        | Serine/threonine-protein kinase D3                      | Prkd3      | 0             | 46              | 9,56                                | 2    | IIRvsS470                                                                                                         |
| Q9JKP5        | Muscleblind-like protein 1                              | Mbnl1      | 1             | 2               | 7,73                                | 2    |                                                                                                                   |
| Q3UIL6        | Pleckstrin homology domain-containing family A member 7 | Plekha7    | 1             | 3               | 6,79                                | 2    | IsRkyS229<br>VpRsiS562<br>LcResT766<br>LpReaT943<br>IiRhtS949<br>LeRlyS1060<br>LsRvsS15                           |
| Q8QZS1        | 3-hydroxyisobutyryl-CoA hydrolase, mitochondrial        | Hibch      | 1             | 3               | 6,31                                | 2    |                                                                                                                   |
| P97861        | Keratin, type II cuticular Hb6                          | Krt86      | 2             | 12              | 6,29                                | 2    |                                                                                                                   |
| Q6A0A2        | La-related protein 4B                                   | Larp4b     | 1             | 13              | 5,68                                | 2    | IIReiS246<br>VdRlpS628                                                                                            |
| P62984        | Ubiquitin-60S ribosomal protein L40                     | Uba52      | 9             | 6               | 4,94                                | 2    |                                                                                                                   |
| A2A7S8        | Uncharacterized protein KIAA1522                        | Kiaa1522   | 3             | 20              | 4,37                                | 2    | IqRrgS136<br>LtRpmS261<br>LgRfsS337<br>LpRppT477<br>LrRalS838<br>LeRpvS909<br>VaRkpS952<br>LpRteS967<br>IeRsiS961 |
| F8VQB6        | Unconventional myosin-X                                 | Myo10      | 2             | 14              | 4,13                                | 2    |                                                                                                                   |
| Q8BHL4        | Retinoic acid-induced protein 3                         | Gprc5a     | 0             | 2               | 4,04                                | 2    | LpRqrS275                                                                                                         |
| Q8K0Y2        | Keratin, type I cuticular Ha3-I                         | Krt33a     | 2             | 6               | 3,93                                | 2    |                                                                                                                   |
| P11352        | Glutathione peroxidase 1                                | Gpx1       | 8             | 10              | 3,50                                | 2    |                                                                                                                   |
| Q5SSZ5        | Tensin 3                                                | Tns3       | 1             | 12              | 3,50                                | 2    | LiRwdS332<br>LIRkpS571<br>VqRgiS648                                                                               |
| Q05915        | GTP cyclohydrolase 1                                    | Gch1       | 2             | 7               | 3,45                                | 2    |                                                                                                                   |
| Q3UJB9        | Enhancer of mRNA-decapping protein 4                    | Edc4       | 1             | 13              | 3,44                                | 2    |                                                                                                                   |
| P11370        | Retrovirus-related Env polyprotein from Fv-4 locus      | Fv4        | 2             | 3               | 3,40                                | 2    | LeRsiT540                                                                                                         |
| P17918        | Proliferating cell nuclear antigen                      | Pcna       | 0             | 2               | 3,27                                | 2    | IcRdiS152                                                                                                         |
| Q640L5        | Coiled-coil domain-containing protein 18                | Ccdc18     | 1             | 2               | 3,26                                | 2    | LeRniS281<br>LdRiIT695<br>LrRsiS1355                                                                              |
| P70275        | Semaphorin-3E                                           | Sema3e     | 4             | 11              | 3,21                                | 2    |                                                                                                                   |
| Q9JJY4        | Probable ATP-dependent RNA                              | Ddx20      | 3             | 6               | 3,19                                | 2    | IiRnyT618                                                                                                         |

| Uniprot entry | Protein names                                        | Gene names | Peptides EGFP | Peptides PKD3ca | norm.log2.Ratio.filt.LFQ.intensity | Sig. | Putative PKD substrate motifs                                                |
|---------------|------------------------------------------------------|------------|---------------|-----------------|------------------------------------|------|------------------------------------------------------------------------------|
|               | helicase DDX20                                       |            |               |                 |                                    |      |                                                                              |
| P13020        | Gelsolin                                             | Gsn        | 9             | 14              | 3,07                               | 2    |                                                                              |
| P28740        | Kinesin-like protein KIF2A                           | Kif2a      | 1             | 5               | 3,03                               | 2    |                                                                              |
| E9QN70        | Laminin subunit beta-1                               | Lamb1      | 2             | 2               | 3,02                               | 2    | LIRppS37                                                                     |
| F6ZDS4        | Nucleoprotein TPR                                    | Tpr        | 0             | 14              | 2,99                               | 2    | LeRseT905<br>LqRasT1130<br>VeRpsT1881                                        |
| Q8BQ30        | Phostensin                                           | Ppp1r18    | 5             | 15              | 2,91                               | 2    | LeRrsS126                                                                    |
| O88487        | Cytoplasmic dynein 1 intermediate chain 2            | Dync1i2    | 3             | 4               | 2,86                               | 2    | VeRalS212                                                                    |
| Q91YD3        | mRNA-decapping enzyme 1A                             | Dcp1a      | 0             | 2               | 2,84                               | 2    | LyrnaS121<br>LpRnsT359<br>LeRkaS542                                          |
| P35492        | Histidine ammonia-lyase                              | Hal        | 21            | 25              | 2,81                               | 2    | LvRshS195                                                                    |
| P28271        | Cytoplasmic aconitate hydratase                      | Aco1       | 1             | 4               | 2,68                               | 2    | VmRfdT867                                                                    |
| Q9CXI3        | DBH-like monooxygenase protein 1                     | Moxd1      | 0             | 4               | 2,54                               | 2    | LtRcsS482<br>lyRpvT503                                                       |
| Q8QZY1        | Eukaryotic translation initiation factor 3 subunit L | Eif3l      | 2             | 4               | 2,50                               | 2    | LIRIhS282<br>IqRtkS348                                                       |
| P35564        | Calnexin                                             | Canx       | 2             | 4               | 2,49                               | 2    |                                                                              |
| Q61699        | Heat shock protein 105 kDa                           | Hsph1      | 1             | 6               | 2,49                               | 2    |                                                                              |
| Q8K2Q9        | Shootin-1                                            | Kiaa1598   | 4             | 24              | 2,46                               | 2    |                                                                              |
| Q9D975        | Sulfiredoxin-1                                       | Srxn1      | 0             | 3               | 2,37                               | 2    |                                                                              |
| Q91YU6        | Leucine zipper putative tumor suppressor 2           | Lzts2      | 1             | 4               | 2,36                               | 2    |                                                                              |
| Q9QXL2        | Kinesin-like protein KIF21A                          | Kif21a     | 5             | 26              | 2,36                               | 2    | LqRlqT739<br>VIRrkT829<br>VtRkIS855<br>LeRrvT933<br>IsRqsS1231<br>LkRfqS1482 |
| Q62266        | Cornifin-A                                           | Sprr1a     | 14            | 10              | 2,07                               | 2    |                                                                              |
| Q6PEM6        | GRAM domain-containing protein 3                     | Gramd3     | 4             | 2               | 1,98                               | 2    | LsRdsT219                                                                    |
| P16331        | Phenylalanine-4-hydroxylase                          | Pah        | 11            | 16              | 1,91                               | 2    | LsRkIS16<br>IpRpfS411                                                        |
| Q9Z1Q9        | Valine--tRNA ligase                                  | Vars       | 4             | 9               | 2,29                               | 1    |                                                                              |
| Q04750        | DNA topoisomerase 1                                  | Top1       | 5             | 4               | 2,25                               | 1    |                                                                              |
| Q9CWY4        | Gem-associated protein 7                             | Gemin7     | 0             | 2               | 2,21                               | 1    |                                                                              |
| Q8K2D3        | Enhancer of mRNA-decapping protein 3                 | Edc3       | 0             | 2               | 2,09                               | 1    | VyRriT262                                                                    |
| P46062        | Signal-induced proliferation-associated protein 1    | Sipa1      | 0             | 6               | 2,04                               | 1    | LIRsgS53<br>LpRtlS903                                                        |
| Q91WK0        | Leucine-rich repeat flightless-interacting protein 2 | Lrrfip2    | 22            | 18              | 1,99                               | 1    | LIRstS151                                                                    |
| Q91WT9        | Cystathionine beta-synthase                          | Cbs        | 2             | 2               | 1,99                               | 1    | IvRtpT190                                                                    |



| Uniprot entry | Protein names                                                               | Gene names        | Peptides EGFP | Peptides PKD3ca | norm.log2.Ratio. filt.LFQ.intensity | Sig. | Putative PKD substrate motifs                                                                                             |
|---------------|-----------------------------------------------------------------------------|-------------------|---------------|-----------------|-------------------------------------|------|---------------------------------------------------------------------------------------------------------------------------|
| P61967        | AP-1 complex subunit sigma-1A                                               | Ap1s1             | 1             | 2               | 1,98                                | 1    |                                                                                                                           |
| O35682        | Myeloid-associated differentiation marker                                   | Myadm             | 2             | 2               | 1,96                                | 1    |                                                                                                                           |
| Q3THS6        | S-adenosylmethionine synthase isoform type-2                                | Mat2a             | 4             | 5               | 1,96                                | 1    | LrRngT172                                                                                                                 |
| Q8CGK3        | Lon protease homolog, mitochondrial                                         | Lonp1             | 5             | 4               | 1,93                                | 1    |                                                                                                                           |
| P09055        | Integrin beta-1                                                             | Itgb1             | 2             | 3               | 1,92                                | 1    |                                                                                                                           |
| Q91VY9        | Zinc finger protein 622                                                     | Znf622            | 2             | 2               | 1,91                                | 1    | LpRavT410<br>VqRmkS452                                                                                                    |
| Q6IMF0        | Keratin, type II cuticular Hb3                                              | Krt83             | 2             | 13              | 1,81                                | 1    |                                                                                                                           |
| Q60953        | Protein PML                                                                 | Pml               | 3             | 7               | 1,76                                | 1    | LdRnhS227<br>LqRirT332<br>LaRnmS748                                                                                       |
| A2AN08        | E3 ubiquitin-protein ligase UBR4                                            | Ubr4              | 8             | 15              | 1,70                                | 1    | LnRldS950<br>LtRmtT1472<br>IvRenS1503<br>VkRtpS1732<br>LvRhaS1760<br>LtRlaS1945<br>IeRapS2364<br>VmRlIS3057<br>LaRhnT4938 |
| Q8VDJ3        | Vigilin                                                                     | Hdlbp             | 0             | 5               | 1,70                                | 1    | VaRlqT149<br>ViRgpS706                                                                                                    |
| P84084        | ADP-ribosylation factor 5                                                   | Arf5              | 3             | 4               | 1,68                                | 1    |                                                                                                                           |
| E9Q450        | Tropomyosin alpha-1 chain                                                   | Tpm1              | 64            | 56              | 1,67                                | 1    |                                                                                                                           |
| P20918        | Plasminogen                                                                 | Plg               | 3             | 14              | 1,64                                | 1    | IpRctT264<br>LsRpaT678                                                                                                    |
| P42125        | Enoyl-CoA delta isomerase 1, mitochondrial                                  | Eci1              | 4             | 4               | 1,61                                | 1    |                                                                                                                           |
| Q91XV3        | Brain acid soluble protein 1                                                | Basp1             | 1             | 3               | 1,59                                | 1    |                                                                                                                           |
| Q921U8        | Smoothelin                                                                  | Smtn              | 10            | 23              | 1,58                                | 1    | VtRlgS521<br>VqRstS798                                                                                                    |
| Q9CQA6        | Coiled-coil-helix-coiled-coil-helix domain-containing protein 1             | Chchd1            | 1             | 2               | 1,58                                | 1    |                                                                                                                           |
| Q99NB9        | Splicing factor 3B subunit 1                                                | Sf3b1             | 2             | 2               | 1,57                                | 1    |                                                                                                                           |
| Q9DBJ3        | Brain-specific angiogenesis inhibitor 1-associated protein 2-like protein 1 | Baiap2l1          | 4             | 7               | 1,54                                | 1    | LqRsvS332                                                                                                                 |
| Q8CC35        | Synaptopodin                                                                | Synpo             | 0             | 4               | 1,54                                | 1    | LgRstS134<br>LaRcpS740                                                                                                    |
| Q91YW3        | DnaJ homolog subfamily C member 3                                           | Dnajc3            | 3             | 2               | 1,52                                | 1    |                                                                                                                           |
| Q0VG62        | Uncharacterized protein C8orf59 homolog                                     | 1810022<br>K09Rik | 2             | 2               | 1,52                                | 1    | VpRpeT34                                                                                                                  |
| P10648        | N-terminally processed;Glutathione S-                                       | Gsta2             | 3             | 6               | 1,51                                | 1    |                                                                                                                           |

| Uniprot entry | Protein names                                                    | Gene names     | Peptides EGFP | Peptides PKD3ca | norm.log2.Ratio. filt.LFQ.intensity | Sig. | Putative PKD substrate motifs                                                                                                                                                                               |
|---------------|------------------------------------------------------------------|----------------|---------------|-----------------|-------------------------------------|------|-------------------------------------------------------------------------------------------------------------------------------------------------------------------------------------------------------------|
|               | transferase A2                                                   |                |               |                 |                                     |      |                                                                                                                                                                                                             |
| Q62523        | Zyxin                                                            | Zyx            | 0             | 2               | 1,50                                | 1    |                                                                                                                                                                                                             |
| A0A087WQ89    | MCG5930                                                          | 2210011 C24Rik | 4             | 6               | 1,49                                | 1    | LsRpgS48                                                                                                                                                                                                    |
| Q9D0R2        | Threonine--tRNA ligase, cytoplasmic                              | Tars           | 0             | 3               | 1,44                                | 1    |                                                                                                                                                                                                             |
| Q8K2I2        | Coiled-coil alpha-helical rod protein 1                          | Cchcr1         | 0             | 4               | 1,44                                | 1    | VeRmsT401<br>VaRipS459                                                                                                                                                                                      |
| P35700        | Peroxiredoxin-1                                                  | Prdx1          | 7             | 10              | 1,41                                | 1    | IIRqiT143                                                                                                                                                                                                   |
| P07901        | Heat shock protein HSP 90-alpha                                  | Hsp90aa1       | 10            | 17              | 1,39                                | 1    | LIRyyT468                                                                                                                                                                                                   |
| Q8VE19        | WD repeat-containing protein mio                                 | Mios           | 6             | 12              | 1,38                                | 1    |                                                                                                                                                                                                             |
| Q9CQ22        | Ragulator complex protein LAMTOR1                                | Lamtor1        | 4             | 4               | 1,36                                | 1    |                                                                                                                                                                                                             |
| Q91YD6        | Villin-like protein                                              | Vill           | 8             | 12              | 1,25                                | 1    |                                                                                                                                                                                                             |
| P99029        | Peroxiredoxin-5, mitochondrial                                   | Prdx5          | 6             | 5               | 1,23                                | 1    | VIRasT21                                                                                                                                                                                                    |
| O70325        | Phospholipid hydroperoxide glutathione peroxidase, mitochondrial | Gpx4           | 4             | 5               | 1,23                                | 1    |                                                                                                                                                                                                             |
| Q91ZU6        | Dystonin                                                         | Dst            | 18            | 40              | 1,21                                | 1    | LhRleS682<br>VaRkkS739<br>IqRkyS833<br>VeRwqS1272<br>LeRqdT1703<br>VIRpeS2146<br>LtRqkS3894<br>LtRskS4092<br>LIRslS4680<br>LdRakT5202<br>LtRqlS5407<br>LIRkqS5488<br>LeRaqS5759<br>VeRgrS6520<br>VpRagS7365 |
| Q9D0I9        | Arginine--tRNA ligase, cytoplasmic                               | Rars           | 5             | 7               | 1,18                                | 1    | IeRgeS336                                                                                                                                                                                                   |
| Q91YR1        | Twinfilin-1                                                      | Twf1           | 17            | 13              | 1,16                                | 1    | LfRldS75                                                                                                                                                                                                    |

## Supplementary Table 2

### Proteins identified by MS from IP with Rxx[S\*/T\*] antibody

| Uniprot entry | Protein names                                  | Gene names | Peptides EGFP | Peptides PKD3ca | norm.log2.Ratio. filt.LFQ.intensity | Sig. | Putative PKD substrate motifs                                                                                          |
|---------------|------------------------------------------------|------------|---------------|-----------------|-------------------------------------|------|------------------------------------------------------------------------------------------------------------------------|
| Q8BQZ4        | Ral GTPase-activating protein subunit beta     | Ralgapb    | 1             | 3               | 10,24                               | 2    | LaResS156<br>IsRprS357<br>InRdnS470<br>LvRgmS971                                                                       |
| P63260        | Actin, cytoplasmic 2                           | Actg1      | 48            | 44              | 8,04                                | 2    |                                                                                                                        |
| Q9JKP5        | Muscleblind-like protein 1                     | Mbnl1      | 1             | 2               | 7,53                                | 2    |                                                                                                                        |
| P35700        | Peroxiredoxin-1                                | Prdx1      | 3             | 11              | 7,19                                | 2    | IIRqiT143                                                                                                              |
| K9J7B2        | UDP-glucuronosyltransferase                    | Ugt1a6b    | 1             | 13              | 6,35                                | 2    | VpRfyT197<br>LkRdvS242<br>ImRIsS443                                                                                    |
| Q62426        | Cystatin-B                                     | Cstb       | 1             | 6               | 6,22                                | 2    |                                                                                                                        |
| P70275        | Semaphorin-3E                                  | Sema3e     | 1             | 14              | 5,85                                | 2    |                                                                                                                        |
| Q62266        | Cornifin-A                                     | Sprr1a     | 2             | 9               | 5,45                                | 2    |                                                                                                                        |
| Q5FWX6        | Serine/threonine-protein kinase D3             | Prkd3      | 3             | 42              | 5,38                                | 2    | IIRvsS470                                                                                                              |
| P54823        | Probable ATP-dependent RNA helicase DDX6       | Ddx6       | 2             | 14              | 5,33                                | 2    |                                                                                                                        |
| P63168        | Dynein light chain 1, cytoplasmic              | Dynll1     | 0             | 3               | 5,26                                | 2    |                                                                                                                        |
| P01887        | Beta-2-microglobulin                           | B2m        | 1             | 2               | 5,24                                | 2    |                                                                                                                        |
| Q80TV8        | CLIP-associating protein 1                     | Clasp1     | 0             | 30              | 5,04                                | 2    | LeRhiS485<br>LnRplS568<br>LqRsrS600<br>LgRirT642<br>VsRiiT1026<br>IgRtpS1098<br>LrRsyS1159<br>ItRedS1333<br>IkRaqT1520 |
| O54962        | Barrier-to-autointegration factor              | Banf1      | 1             | 3               | 5,00                                | 2    |                                                                                                                        |
| Q80U30        | Protein CLEC16A                                | Clec16a    | 1             | 2               | 4,96                                | 2    | IIRqkS89                                                                                                               |
| P12787        | Cytochrome c oxidase subunit 5A, mitochondrial | Cox5a      | 0             | 3               | 4,95                                | 2    |                                                                                                                        |
| Q8VCH8        | UBX domain-containing protein 4                | Ubxn4      | 0             | 7               | 4,95                                | 2    | IeRrkT230<br>VkResT310<br>IwRliS428<br>IyRlrT487<br>LkRvdT71<br>LdRnpS308<br>VaRcwT313                                 |
| P10810        | Monocyte differentiation antigen CD14          | Cd14       | 1             | 10              | 4,87                                | 2    |                                                                                                                        |
| O09106        | Histone deacetylase 1                          | Hdac1      | 0             | 8               | 4,83                                | 2    |                                                                                                                        |
| Q9CXF4        | TBC1 domain family member 15                   | Tbc1d15    | 0             | 3               | 4,81                                | 2    |                                                                                                                        |
| Q9CQQ7        | ATP synthase F(0) complex                      | Atp5f1     | 2             | 7               | 4,80                                | 2    |                                                                                                                        |

| Uniprot entry | Protein names                                               | Gene names | Peptides EGFP | Peptides PKD3ca | norm.log2.Ratio. filt.LFQ.intensity | Sig. | Putative PKD substrate motifs                                     |
|---------------|-------------------------------------------------------------|------------|---------------|-----------------|-------------------------------------|------|-------------------------------------------------------------------|
|               | subunit B1, mitochondrial                                   |            |               |                 |                                     |      |                                                                   |
| P27773        | Protein disulfide-isomerase A3                              | Pdia3      | 1             | 11              | 4,58                                | 2    | LqReaT485                                                         |
| P62821        | Ras-related protein Rab-1A                                  | Rab1A      | 1             | 4               | 4,53                                | 2    | IdRyaS114                                                         |
| P09528        | Ferritin heavy chain                                        | Fth1       | 1             | 8               | 4,49                                | 2    |                                                                   |
| Q9DBG1        | Sterol 26-hydroxylase, mitochondrial                        | Cyp27a1    | 1             | 11              | 4,47                                | 2    | VsRdpS439                                                         |
| Q8K0D0        | Cyclin-dependent kinase 17                                  | Cdk17      | 0             | 4               | 4,47                                | 2    | LrRphS75<br>IhRriS137<br>LaRakS339                                |
| Q8BHL4        | Retinoic acid-induced protein 3                             | Gprc5a     | 0             | 3               | 4,46                                | 2    | LpRqrS275                                                         |
| P20918        | Plasminogen                                                 | Plg        | 2             | 12              | 4,39                                | 2    | IpRctT264<br>LsRpaT678                                            |
| Q9R049        | E3 ubiquitin-protein ligase AMFR                            | Amfr       | 0             | 12              | 4,34                                | 2    | LqRqrT642                                                         |
| Q05421        | Cytochrome P450 2E1                                         | Cyp2e1     | 1             | 15              | 4,27                                | 2    |                                                                   |
| Q3UJB9        | Enhancer of mRNA-decapping protein 4                        | Edc4       | 0             | 12              | 4,22                                | 2    |                                                                   |
| Q91WT8        | RNA-binding protein 47                                      | Rbm47      | 2             | 7               | 4,13                                | 2    | VqRipT533                                                         |
| P11352        | Glutathione peroxidase 1                                    | Gpx1       | 4             | 12              | 4,13                                | 2    |                                                                   |
| Q8BQ30        | Phostensin                                                  | Ppp1r18    | 4             | 23              | 4,09                                | 2    | LeRrsS126                                                         |
| Q9DCX2        | ATP synthase subunit d, mitochondrial                       | Atp5h      | 1             | 3               | 4,06                                | 2    |                                                                   |
| Q64282        | Interferon-induced protein with tetratricopeptide repeats 1 | Ifit1      | 1             | 13              | 4,06                                | 2    |                                                                   |
| Q8R084        | UDP-glucuronosyltransferase                                 | Ugt2b1     | 2             | 8               | 4,05                                | 2    | LgRptT246                                                         |
| P03975        | IgE-binding protein                                         | Iap        | 1             | 9               | 4,02                                | 2    | VsRkrS107                                                         |
| Q8VCW8        | Acyl-CoA synthetase family member 2, mitochondrial          | Acsf2      | 1             | 7               | 3,93                                | 2    |                                                                   |
| V9GX76        | Unconventional myosin-VI                                    | Myo6       | 73            | 93              | 3,93                                | 2    | VIRyIT169<br>LnRgcT279                                            |
| Q8CHQ9        | Probable N-acetyltransferase CML2                           | Cml2       | 2             | 7               | 3,92                                | 2    |                                                                   |
| P61222        | ATP-binding cassette sub-family E member 1                  | Abce1      | 1             | 5               | 3,91                                | 2    |                                                                   |
| Q3TJZ6        | Protein FAM98A                                              | Fam98a     | 0             | 6               | 3,90                                | 2    | IIRtsS283                                                         |
| P14211        | Calreticulin                                                | Calr       | 1             | 10              | 3,88                                | 2    |                                                                   |
| Q6PDK2        | Histone-lysine N-methyltransferase 2D                       | Kmt2d      | 2             | 25              | 3,82                                | 2    | LgRagT424<br>VIRniT1560<br>LdRipT1837<br>IsRgqT2695<br>VsRppS2962 |
| Q9CY27        | Very-long-chain enoyl-CoA reductase                         | Tecr       | 1             | 7               | 3,75                                | 2    |                                                                   |
| Q02013        | Aquaporin-1                                                 | Aqp1       | 1             | 3               | 3,75                                | 2    | LeRnqT44<br>LtnfS207                                              |
| P62071        | Ras-related protein R-Ras2                                  | Rras2      | 1             | 7               | 3,73                                | 2    |                                                                   |
| F8VQB6        | Unconventional myosin-X                                     | Myo10      | 0             | 24              | 3,72                                | 2    | IeRslS961                                                         |

| Uniprot entry | Protein names                                      | Gene names | Peptides EGFP | Peptides PKD3ca | norm.log2.Ratio. filt.LFQ.intensity | Sig. | Putative PKD substrate motifs                                                                                                                      |
|---------------|----------------------------------------------------|------------|---------------|-----------------|-------------------------------------|------|----------------------------------------------------------------------------------------------------------------------------------------------------|
| P58660        | Caspase recruitment domain-containing protein 10   | Card10     | 4             | 9               | 3,68                                | 2    | VrRvIS629<br>VeRgsS1011                                                                                                                            |
| O88342        | WD repeat-containing protein 1                     | Wdr1       | 1             | 3               | 3,68                                | 2    | VeRgvS20                                                                                                                                           |
| Q91YN9        | BAG family molecular chaperone regulator 2         | Bag2       | 2             | 5               | 3,66                                | 2    |                                                                                                                                                    |
| Q99104        | Unconventional myosin-Va                           | Myo5a      | 3             | 17              | 3,65                                | 2    | IrRaaT841                                                                                                                                          |
| Q91YU6        | Leucine zipper putative tumor suppressor 2         | Lzts2      | 0             | 8               | 3,64                                | 2    |                                                                                                                                                    |
| P63242        | Eukaryotic translation initiation factor 5A-1      | Eif5a      | 1             | 3               | 3,64                                | 2    |                                                                                                                                                    |
| Q9CQW9        | Interferon-induced transmembrane protein 3         | Ifitm3     | 1             | 3               | 3,64                                | 2    |                                                                                                                                                    |
| Q922F4        | Tubulin beta-6 chain                               | Tubb6      | 6             | 21              | 3,63                                | 2    |                                                                                                                                                    |
| Q8VCX1        | 3-oxo-5-beta-steroid 4-dehydrogenase               | Akr1d1     | 1             | 2               | 3,61                                | 2    |                                                                                                                                                    |
| Q99KK2        | N-acylneuraminatase cytidylyltransferase           | Cmas       | 0             | 12              | 3,61                                | 2    | LaRggS53<br>VhRrsS111                                                                                                                              |
| Q8BG80        | F-box only protein 46                              | Fbxo46     | 0             | 8               | 3,61                                | 2    | LyRhvS453                                                                                                                                          |
| Q61937        | Nucleophosmin                                      | Npm1       | 2             | 5               | 3,60                                | 2    |                                                                                                                                                    |
| Q9JLJ2        | 4-trimethylaminobutyraldehyde dehydrogenase        | Aldh9a1    | 3             | 10              | 3,58                                | 2    |                                                                                                                                                    |
| P56593        | Cytochrome P450 2A12                               | Cyp2a12    | 0             | 12              | 3,55                                | 2    | IpRriT373                                                                                                                                          |
| P58137        | Acyl-coenzyme A thioesterase 8                     | Acot8      | 1             | 4               | 3,52                                | 2    | VeRirT104                                                                                                                                          |
| Q9JHU4        | Cytoplasmic dynein 1 heavy chain 1                 | Dync1h1    | 4             | 20              | 3,52                                | 2    | IsRdlS387<br>IdRveT560<br>IdRqIT657<br>LpRiqS999<br>LeRerS1622<br>LaRlrS2382<br>IrRitT2521<br>VhRkyT2966<br>LeRmnT3008<br>LeRlIT4272<br>LpRswS4462 |
| Q63886        | UDP-glucuronosyltransferase 1-1                    | Ugt1a1     | 2             | 12              | 3,51                                | 2    | VkRdsS123<br>ImRlsS447                                                                                                                             |
| Q99K48        | Non-POU domain-containing octamer-binding protein  | Nono       | 3             | 7               | 3,50                                | 2    |                                                                                                                                                    |
| Q8BHD7        | Polypyrimidine tract-binding protein 3             | Ptbp3      | 2             | 11              | 3,48                                | 2    |                                                                                                                                                    |
| Q922P9        | Putative oxidoreductase GLYR1                      | Glyr1      | 1             | 6               | 3,46                                | 2    |                                                                                                                                                    |
| A2AIX1        | Protein transport protein sec16                    | Sec16a     | 0             | 17              | 3,44                                | 2    | LtRapS2101<br>LsRcsS2315                                                                                                                           |
| Q8BWS5        | G protein-regulated inducer of neurite outgrowth 3 | Gprin3     | 0             | 7               | 3,43                                | 2    |                                                                                                                                                    |
| Q91VY9        | Zinc finger protein 622                            | Znf622     | 0             | 8               | 3,43                                | 2    | LpRavT410<br>VqRmkS452                                                                                                                             |
| Q3UMC0        | Spermatogenesis-associated                         | Spata5     | 1             | 4               | 3,41                                | 2    | VeRgsS739                                                                                                                                          |

| Uniprot entry | Protein names                                                                      | Gene names | Peptides EGFP | Peptides PKD3ca | norm.log2.Ratio. filt.LFQ.intensity | Sig. | Putative PKD substrate motifs                                                                                                                                                                               |
|---------------|------------------------------------------------------------------------------------|------------|---------------|-----------------|-------------------------------------|------|-------------------------------------------------------------------------------------------------------------------------------------------------------------------------------------------------------------|
|               | protein 5                                                                          |            |               |                 |                                     |      |                                                                                                                                                                                                             |
| Q61699        | Heat shock protein 105 kDa                                                         | Hsph1      | 0             | 7               | 3,35                                | 2    |                                                                                                                                                                                                             |
| Q61495        | Desmoglein-1-alpha                                                                 | Dsg1a      | 2             | 2               | 3,31                                | 2    | VdRevT120<br>VfRpgS389<br>LqRtcT476                                                                                                                                                                         |
| Q9D2G2        | Dihydrolipoyllysine-residue succinyltransferase component of 2-OGDC, mitochondrial | Dlst       | 1             | 8               | 3,28                                | 2    | VsRafS13                                                                                                                                                                                                    |
| Q5U465        | Coiled-coil domain-containing protein 125                                          | Ccdc125    | 0             | 8               | 3,28                                | 2    | VpRssS9<br>LkRscS492                                                                                                                                                                                        |
| P17182        | Alpha-enolase                                                                      | Eno1       | 1             | 9               | 3,28                                | 2    |                                                                                                                                                                                                             |
| Q9CQF0        | 39S ribosomal protein L11, mitochondrial                                           | Mrpl11     | 1             | 7               | 3,27                                | 2    |                                                                                                                                                                                                             |
| P13020        | Gelsolin                                                                           | Gsn        | 6             | 10              | 3,27                                | 2    |                                                                                                                                                                                                             |
| P26039        | Talin-1                                                                            | Tln1       | 1             | 10              | 3,26                                | 2    | LnRcvS1201                                                                                                                                                                                                  |
| Q921G7        | Electron transfer flavoprotein-ubiquinone oxidoreductase, mitochondrial            | Etfdh      | 1             | 4               | 3,25                                | 2    | VnRnlS550                                                                                                                                                                                                   |
| Q62186        | Translocon-associated protein subunit delta                                        | Ssr4       | 1             | 4               | 3,25                                | 2    |                                                                                                                                                                                                             |
| O35632        | Hyaluronidase-2                                                                    | Hyal2      | 1             | 3               | 3,20                                | 2    | VyRqsS155<br>VrRnpS382                                                                                                                                                                                      |
| P09803        | Cadherin-1                                                                         | Cdh1       | 1             | 4               | 3,19                                | 2    |                                                                                                                                                                                                             |
| P08226        | Apolipoprotein E                                                                   | ApoE       | 1             | 12              | 3,17                                | 2    |                                                                                                                                                                                                             |
| Q91ZU6        | Dystonin                                                                           | Dst        | 9             | 65              | 3,16                                | 2    | LhRleS682<br>VaRkkS739<br>IqRkyS833<br>VeRwqS1272<br>LeRqdT1703<br>VIRpeS2146<br>LtRqkS3894<br>LtRskS4092<br>LIRslS4680<br>LdRakT5202<br>LtRqlS5407<br>LIRkqS5488<br>LeRaqS5759<br>VeRgrS6520<br>VpRagS7365 |
| Q6PGG6        | Guanine nucleotide-binding protein-like 3-like protein                             | Gnl3l      | 0             | 2               | 3,16                                | 2    |                                                                                                                                                                                                             |
| P35564        | Calnexin                                                                           | Canx       | 1             | 7               | 3,16                                | 2    |                                                                                                                                                                                                             |
| O35295        | Transcriptional activator protein Pur-beta                                         | Purb       | 1             | 8               | 3,14                                | 2    |                                                                                                                                                                                                             |
| P34914        | Bifunctional epoxide hydrolase 2                                                   | Ephx2      | 1             | 4               | 3,14                                | 2    |                                                                                                                                                                                                             |
| Q8BGH2        | Sorting and assembly machinery component 50 homolog                                | Samm50     | 0             | 8               | 3,14                                | 2    | LsRtaS243                                                                                                                                                                                                   |

| Uniprot entry | Protein names                                                                          | Gene names     | Peptides EGFP | Peptides PKD3ca | norm.log2.Ratio. filt.LFQ.intensity | Sig. | Putative PKD substrate motifs                                                   |
|---------------|----------------------------------------------------------------------------------------|----------------|---------------|-----------------|-------------------------------------|------|---------------------------------------------------------------------------------|
| Q64433        | 10 kDa heat shock protein, mitochondrial                                               | Hspe1          | 1             | 2               | 3,13                                | 2    |                                                                                 |
| Q61753        | D-3-phosphoglycerate dehydrogenase                                                     | Phgdh          | 2             | 14              | 3,12                                | 2    | IvRsaT57<br>VgRagT78<br>LlReaS383                                               |
| P09055        | Integrin beta-1                                                                        | Itgb1          | 1             | 5               | 3,11                                | 2    |                                                                                 |
| P53996        | Cellular nucleic acid-binding protein                                                  | Cnbp           | 0             | 6               | 3,10                                | 2    | LaRecT173                                                                       |
| Q9CQE8        | UPF0568 protein C14orf166 homolog                                                      | RTRAF          | 0             | 6               | 3,09                                | 2    |                                                                                 |
| Q9Z2I8        | Succinyl-CoA ligase [GDP-forming] subunit beta, mitochondrial                          | Suclg2         | 2             | 15              | 3,09                                | 2    |                                                                                 |
| Q9Z2I0        | LETM1 and EF-hand domain-containing protein 1, mitochondrial                           | Letm1          | 0             | 5               | 3,05                                | 2    | LsRccT55                                                                        |
| Q91VW5        | Golgin subfamily A member 4                                                            | Golga4         | 9             | 48              | 3,02                                | 2    | LvRtsS119<br>LeRqrS891<br>LqRrlS1761                                            |
| Q9JHI7        | Exosome complex component RRP45                                                        | Exosc9         | 1             | 6               | 3,02                                | 2    |                                                                                 |
| P80316        | T-complex protein 1 subunit epsilon                                                    | Cct5           | 4             | 12              | 3,01                                | 2    |                                                                                 |
| Q91YH5        | Atlastin-3                                                                             | Atf3           | 1             | 6               | 3,01                                | 2    | LiRdwS216                                                                       |
| Q8K154        | UDP-glucuronosyltransferase                                                            | Ugt2b34        | 1             | 7               | 3,01                                | 2    | LgRptT248                                                                       |
| Q8R081        | Heterogeneous nuclear ribonucleoprotein L                                              | Hnrnpl         | 0             | 4               | 3,00                                | 2    | VdRaiT434<br>VkRptS528                                                          |
| A0A087WQ89    | MCG5930                                                                                | 2210011 C24Rik | 1             | 9               | 2,97                                | 2    | LsRpgS48                                                                        |
| Q61029        | Lamina-associated polypeptide 2, isoforms beta/delta/epsilon/gamma                     | Tmpo           | 14            | 24              | 2,96                                | 2    | VgRkaT95<br>LtResT250                                                           |
| Q8CGC7        | Bifunctional glutamate/proline-tRNA ligase;Glutamate--tRNA ligase;Proline--tRNA ligase | Eprs           | 0             | 9               | 2,96                                | 2    | LaRiaT63<br>LrRgmT467<br>IIRpwS1053                                             |
| Q3UEP4        | UDP-glucuronosyltransferase                                                            | Ugt2b36        | 1             | 6               | 2,96                                | 2    | VIRpsT60<br>LgRptT246                                                           |
| P32067        | Lupus La protein homolog                                                               | Ssb            | 4             | 11              | 2,95                                | 2    | LnRltT63 IrRspS94                                                               |
| Q0VG62        | Uncharacterized protein C8orf59 homolog                                                | 1810022 K09Rik | 1             | 2               | 2,95                                | 2    | VpRpeT34                                                                        |
| E9Q5F4        | Actin, cytoplasmic 1                                                                   | Actb           | 30            | 31              | 2,94                                | 2    |                                                                                 |
| Q91ZA3        | Propionyl-CoA carboxylase alpha chain, mitochondrial                                   | Pcca           | 0             | 9               | 2,94                                | 2    | VsRslS48<br>ViRgvT475                                                           |
| P1063         | Thioredoxin                                                                            | Txn            | 1             | 3               | 2,92                                | 2    |                                                                                 |
| Q6VGS5        | Protein Daple                                                                          | Ccdc88c        | 0             | 19              | 2,91                                | 2    | LqRelS787<br>LiRqhS1184<br>VdRtdT1493<br>VsRsaS1792<br>LsRafS1798<br>LaRerT1848 |

| Uniprot entry | Protein names                                                                                              | Gene names | Peptides EGFP | Peptides PKD3ca | norm.log2.Ratio. filt.LFQ.intensity | Sig. | Putative PKD substrate motifs                                                                                                                                                     |
|---------------|------------------------------------------------------------------------------------------------------------|------------|---------------|-----------------|-------------------------------------|------|-----------------------------------------------------------------------------------------------------------------------------------------------------------------------------------|
| P24369        | Peptidyl-prolyl cis-trans isomerase B                                                                      | Ppib       | 0             | 5               | 2,90                                | 2    |                                                                                                                                                                                   |
| Q6ZWQ0        | Nesprin-2                                                                                                  | Syne2      | 12            | 67              | 2,90                                | 2    | IrRgrT968<br>LrRImS1184<br>LaRlqT3013<br>IIRkIS3097<br>LqRvrS3527<br>LsRtnS4096<br>VkRlyS4634<br>LhRlqT4927<br>IsRlvT5687<br>LqRwrT5743<br>IsRlqS5794<br>LaRieS6030<br>LIRqgT6489 |
| Q8CGB3        | Uveal autoantigen with coiled-coil domains and ankyrin repeats                                             | Uaca       | 0             | 13              | 2,90                                | 2    |                                                                                                                                                                                   |
| Q9QUI0        | Transforming protein RhoA                                                                                  | Rhoa       | 0             | 2               | 2,89                                | 2    |                                                                                                                                                                                   |
| P56391        | Cytochrome c oxidase subunit 6B1                                                                           | Cox6b1     | 1             | 2               | 2,88                                | 2    |                                                                                                                                                                                   |
| P14602        | Heat shock protein beta-1                                                                                  | Hspb1      | 2             | 5               | 2,87                                | 2    | LIRspS15<br>LnRqIS86<br>IsRcfT143                                                                                                                                                 |
| Q791V5        | Mitochondrial carrier homolog 2                                                                            | Mtch2      | 1             | 5               | 2,86                                | 2    |                                                                                                                                                                                   |
| Q9DBF1        | Alpha-aminoacidic semialdehyde dehydrogenase                                                               | Aldh7a1    | 3             | 9               | 2,85                                | 2    | LgRlvS133<br>VdRlrS352                                                                                                                                                            |
| Q3U0V1        | Far upstream element-binding protein 2                                                                     | Khsrp      | 2             | 7               | 2,84                                | 2    |                                                                                                                                                                                   |
| P97432        | Next to BRCA1 gene 1 protein                                                                               | Nbr1       | 0             | 2               | 2,82                                | 2    | LgRpeS351<br>ViRsiT659                                                                                                                                                            |
| P52480        | Pyruvate kinase PKM                                                                                        | Pkm        | 1             | 2               | 2,82                                | 2    | LvRasS403                                                                                                                                                                         |
| A2AI08        | Taperin                                                                                                    | Tprn       | 2             | 8               | 2,82                                | 2    | VnRslS255                                                                                                                                                                         |
| P68373        | Tubulin alpha-1C chain                                                                                     | Tuba1c     | 7             | 18              | 2,80                                | 2    | LnRliS232                                                                                                                                                                         |
| P10649        | Glutathione S-transferase Mu 1                                                                             | Gstm1      | 1             | 7               | 2,78                                | 2    |                                                                                                                                                                                   |
| Q9WU79        | Proline dehydrogenase 1, mitochondrial                                                                     | Prodh      | 1             | 6               | 2,78                                | 2    |                                                                                                                                                                                   |
| Q99PP6        | Tripartite motif-containing protein 34A                                                                    | Trim34a    | 2             | 8               | 2,77                                | 2    | LrRewS243                                                                                                                                                                         |
| Q8BX02        | KN motif and ankyrin repeat domain-containing protein 2                                                    | Kank2      | 0             | 4               | 2,76                                | 2    |                                                                                                                                                                                   |
| P53395        | Lipoamide acyltransferase component of branched-chain alpha-keto acid dehydrogenase complex, mitochondrial | Dbt        | 1             | 10              | 2,75                                | 2    | VIRtwS11                                                                                                                                                                          |
| P62835        | Ras-related protein Rap-1A                                                                                 | Rap1a      | 1             | 4               | 2,74                                | 2    |                                                                                                                                                                                   |
| Q8JZN5        | Acyl-CoA dehydrogenase family member 9,                                                                    | Acad9      | 1             | 3               | 2,74                                | 2    | LsRgaT12<br>VIRefT28                                                                                                                                                              |



| Uniprot entry | Protein names                                                                                                       | Gene names | Peptides EGFP | Peptides PKD3ca | norm.log2.Ratio. filt.LFQ.intensity | Sig. | Putative PKD substrate motifs                                                              |
|---------------|---------------------------------------------------------------------------------------------------------------------|------------|---------------|-----------------|-------------------------------------|------|--------------------------------------------------------------------------------------------|
|               | mitochondrial                                                                                                       |            |               |                 |                                     |      |                                                                                            |
| Q8C052        | Microtubule-associated protein 1S                                                                                   | Map1s      | 0             | 6               | 2,74                                | 2    | LrRlIS324<br>LaRrsT659<br>LtRkpS831                                                        |
| P51658        | Estradiol 17-beta-dehydrogenase 2                                                                                   | Hsd17b2    | 2             | 7               | 2,73                                | 2    |                                                                                            |
| P19536        | Cytochrome c oxidase subunit 5B, mitochondrial                                                                      | Cox5b      | 1             | 2               | 2,70                                | 2    |                                                                                            |
| Q9D6Y9        | 1,4-alpha-glucan-branching enzyme                                                                                   | Gbe1       | 1             | 7               | 2,69                                | 2    |                                                                                            |
| Q99MR8        | Methylcrotonoyl-CoA carboxylase subunit alpha, mitochondrial                                                        | Mccc1      | 1             | 10              | 2,69                                | 2    |                                                                                            |
| Q61037        | Tuberin                                                                                                             | Tsc2       | 5             | 23              | 2,68                                | 2    | lIRelS49<br>LIRadS625<br>lyRcaS802<br>LvRrpT1203<br>LpRsnT1270<br>LhRsvS1291<br>leRaiS1365 |
| Q8QZY3        | Developmental pluripotency-associated protein 3                                                                     | Dppa3      | 0             | 8               | 2,68                                | 2    |                                                                                            |
| Q3TDQ1        | Dolichyl-diphosphooligosaccharide--protein glycosyltransferase subunit STT3B                                        | Stt3b      | 0             | 4               | 2,67                                | 2    | ViRfeS94                                                                                   |
| Q9R0Q7        | Prostaglandin E synthase 3                                                                                          | Ptges3     | 0             | 2               | 2,64                                | 2    |                                                                                            |
| Q80U72        | Protein scribble homolog                                                                                            | Scrib      | 1             | 10              | 2,63                                | 2    | LqRraT475<br>LiRkdT606<br>ldReIS1218<br>LqRgpS1271                                         |
| Q8R3L2        | Transcription factor 25                                                                                             | Tcf25      | 1             | 6               | 2,63                                | 2    |                                                                                            |
| Q91WQ3        | Tyrosine--tRNA ligase;Tyrosine--tRNA ligase, cytoplasmic;Tyrosine--tRNA ligase, cytoplasmic, N-terminally processed | Yars       | 1             | 10              | 2,62                                | 2    | VyRIsS138                                                                                  |
| Q8K2I2        | Coiled-coil alpha-helical rod protein 1                                                                             | Cchcr1     | 0             | 5               | 2,62                                | 2    | VeRmsT401<br>VaRipS459                                                                     |
| P35456        | Urokinase plasminogen activator surface receptor                                                                    | Plaur      | 1             | 4               | 2,60                                | 2    |                                                                                            |
| Q9QYC0        | Alpha-adducin                                                                                                       | Add1       | 1             | 5               | 2,59                                | 2    | VdRgsT212                                                                                  |
| P28843        | Dipeptidyl peptidase 4                                                                                              | Dpp4       | 1             | 5               | 2,59                                | 2    |                                                                                            |
| Q9R0L6        | Pericentriolar material 1 protein                                                                                   | Pcm1       | 5             | 30              | 2,59                                | 2    | VgRrrT77<br>LtReiS378<br>VsRhiS1432                                                        |
| Q922B9        | Sperm-specific antigen 2 homolog                                                                                    | Ssfa2      | 1             | 4               | 2,59                                | 2    | LqRigS268<br>LtRsnT290<br>LIRtaS502<br>LpReeS640                                           |

| Uniprot entry | Protein names                                                                  | Gene names | Peptides EGFP | Peptides PKD3ca | norm.log2.Ratio. filt.LFQ.intensity | Sig. | Putative PKD substrate motifs        |
|---------------|--------------------------------------------------------------------------------|------------|---------------|-----------------|-------------------------------------|------|--------------------------------------|
| G3UWQ7        | Protein regulator of cytokinesis 1                                             | Prc1       | 0             | 2               | 2,59                                | 2    | VdRsqS728<br>LiReqS1075<br>LqRelS601 |
| Q8C4X2        | Casein kinase I isoform gamma-3                                                | Csnk1g3    | 0             | 11              | 2,58                                | 2    |                                      |
| Q9Z0P5        | Twinfilin-2                                                                    | Twf2       | 1             | 4               | 2,57                                | 2    | LfRldS75                             |
| P16331        | Phenylalanine-4-hydroxylase                                                    | Pah        | 0             | 9               | 2,56                                | 2    | LsRklS16<br>lpRpfS411                |
| Q9WVK4        | EH domain-containing protein 1                                                 | Ehd1       | 1             | 6               | 2,56                                | 2    |                                      |
| Q9Z1M8        | Protein Red                                                                    | lk         | 0             | 5               | 2,54                                | 2    |                                      |
| P46978        | Dolichyl-diphosphooligosaccharide--protein glycosyltransferase subunit STT3A   | Stt3a      | 1             | 5               | 2,54                                | 2    | VIRfeS43<br>VdRegS631                |
| P21278        | Guanine nucleotide-binding protein subunit alpha-11                            | Gna11      | 1             | 6               | 2,53                                | 2    | VdRiaT169                            |
| O70194        | Eukaryotic translation initiation factor 3 subunit D                           | Eif3d      | 1             | 5               | 2,51                                | 2    | VqRvgS274<br>ViRvyS521               |
| P47740        | Fatty aldehyde dehydrogenase                                                   | Aldh3a2    | 2             | 11              | 2,49                                | 2    |                                      |
| O70479        | BTB/POZ domain-containing adapter for CUL3-mediated RhoA degradation protein 2 | Tnfaip1    | 1             | 7               | 2,49                                | 2    | LtRhdT51<br>VkRysT302                |
| Q8BG05        | Heterogeneous nuclear ribonucleoprotein A3                                     | Hnrnpa3    | 0             | 5               | 2,46                                | 2    | VsRedS94                             |
| Q8BJ64        | Choline dehydrogenase, mitochondrial                                           | Chdh       | 2             | 3               | 2,44                                | 2    | VsRgkT196                            |
| P24456        | Cytochrome P450 2D10                                                           | Cyp2d10    | 3             | 10              | 2,42                                | 2    | LpRitS382                            |
| Q9WV55        | Vesicle-associated membrane protein-associated protein A                       | Vapa       | 1             | 7               | 2,41                                | 2    |                                      |
| B7ZMP1        | Probable Xaa-Pro aminopeptidase 3                                              | Xpnpep3    | 1             | 3               | 2,41                                | 2    | LqRryS32                             |
| P28656        | Nucleosome assembly protein 1-like 1                                           | Nap111     | 1             | 6               | 2,40                                | 2    |                                      |
| Q9QXG4        | Acetyl-coenzyme A synthetase, cytoplasmic                                      | Acss2      | 0             | 3               | 2,40                                | 2    |                                      |
| Q91VH2        | Sorting nexin-9                                                                | Snx9       | 1             | 9               | 2,39                                | 2    | IqRgnS194<br>VkRvgT543               |
| P18406        | Protein CYR61                                                                  | Cyr61      | 1             | 10              | 2,39                                | 2    | IcRaqS95                             |
| Q9DAW6        | U4/U6 small nuclear ribonucleoprotein Prp4                                     | Prpf4      | 2             | 6               | 2,38                                | 2    |                                      |
| Q8BP47        | Asparagine--tRNA ligase, cytoplasmic                                           | Nars       | 2             | 6               | 2,38                                | 2    | VIRdgT164<br>LeRflS536               |
| Q9R0H0        | Peroxisomal acyl-coenzyme A oxidase 1                                          | Acox1      | 3             | 13              | 2,37                                | 2    |                                      |
| P24549        | Retinal dehydrogenase 1                                                        | Aldh1a1    | 3             | 15              | 2,35                                | 2    |                                      |
| Q64458        | Cytochrome P450 2C29                                                           | Cyp2c29    | 2             | 9               | 2,33                                | 2    | LwRqsS24<br>VgRhrS336                |
| P61967        | AP-1 complex subunit sigma-                                                    | Ap1s1      | 0             | 3               | 2,31                                | 2    |                                      |

| Uniprot entry | Protein names                                                                  | Gene names | Peptides EGFP | Peptides PKD3ca | norm.log2.Ratio. filt.LFQ.intensity | Sig. | Putative PKD substrate motifs                                                                                                         |
|---------------|--------------------------------------------------------------------------------|------------|---------------|-----------------|-------------------------------------|------|---------------------------------------------------------------------------------------------------------------------------------------|
|               | 1A                                                                             |            |               |                 |                                     |      |                                                                                                                                       |
| P16406        | Glutamyl aminopeptidase                                                        | Enpep      | 1             | 8               | 2,28                                | 2    | ViRyiS849<br>LgRivT885                                                                                                                |
| Q922M3        | BTB/POZ domain-containing adapter for CUL3-mediated RhoA degradation protein 3 | Kctd10     | 2             | 12              | 2,27                                | 2    |                                                                                                                                       |
| Q62433        | Protein NDRG1                                                                  | Ndrp1      | 7             | 10              | 2,11                                | 2    | LmRsrT328                                                                                                                             |
| P62960        | Nuclease-sensitive element-binding protein 1                                   | Ybx1       | 7             | 20              | 2,00                                | 2    | InRndT78                                                                                                                              |
| Q99JB8        | Protein kinase C and casein kinase II substrate protein 3                      | Pacsin3    | 4             | 19              | 2,61                                | 1    |                                                                                                                                       |
| Q9QXZ0        | Microtubule-actin cross-linking factor 1                                       | Macf1      | 15            | 56              | 2,47                                | 1    | LeRekS418<br>IkRkyT814<br>VfRskT854<br>IeRnqT1331<br>IdRqvT1767<br>LkRqgS3889<br>IsRqkS4129<br>LeRrwT5394<br>LsRgdS6362<br>IeRgrS6501 |
| Q9CY66        | H/ACA ribonucleoprotein complex subunit 1                                      | Gar1       | 2             | 3               | 2,26                                | 1    |                                                                                                                                       |
| P60766        | Cell division control protein 42 homolog                                       | Cdc42      | 0             | 3               | 2,25                                | 1    |                                                                                                                                       |
| Q9DB77        | Cytochrome b-c1 complex subunit 2, mitochondrial                               | Uqcrc2     | 4             | 10              | 2,18                                | 1    | LsRagS9<br>LIRIaS87                                                                                                                   |
| Q03963        | Interferon-induced, double-stranded RNA-activated protein kinase               | Eif2ak2    | 0             | 4               | 2,11                                | 1    |                                                                                                                                       |
| Q99N93        | 39S ribosomal protein L16, mitochondrial                                       | Mrpl16     | 1             | 3               | 2,07                                | 1    |                                                                                                                                       |
| QQ80YE7       | Death-associated protein kinase 1                                              | Dapk1      | 1             | 9               | 2,04                                | 1    | IeRevS66<br>LsRkaS289<br>VsRrdS1433                                                                                                   |
| P68368        | Tubulin alpha-4A chain                                                         | Tuba4a     | 7             | 18              | 2,01                                | 1    | LnRliS232                                                                                                                             |
| P42932        | T-complex protein 1 subunit theta                                              | Cct8       | 5             | 18              | 1,97                                | 1    | LvRlnS317<br>VIRgsT381                                                                                                                |
| Q9D0M3        | Cytochrome c1, heme protein, mitochondrial                                     | Cyc1       | 3             | 4               | 1,96                                | 1    |                                                                                                                                       |
| P50544        | Very long-chain specific acyl-CoA dehydrogenase, mitochondrial                 | Acadvl     | 2             | 17              | 1,93                                | 1    | LpRvaS208                                                                                                                             |
| Q9DBG6        | Dolichyl-diphosphooligosaccharide--protein glycosyltransferase subunit 2       | Rpn2       | 0             | 5               | 1,91                                | 1    | LdRpfT46                                                                                                                              |
| Q8C7U1        | NEDD4-binding protein 3                                                        | N4bp3      | 0             | 6               | 1,91                                | 1    |                                                                                                                                       |
| O88967        | ATP-dependent zinc metalloprotease YME1L1                                      | Yme1l1     | 0             | 6               | 1,91                                | 1    |                                                                                                                                       |
| E9Q555        | E3 ubiquitin-protein ligase                                                    | Rnf213     | 8             | 24              | 1,90                                | 1    | IhRggS427                                                                                                                             |

| Uniprot entry | Protein names                                                           | Gene names | Peptides EGFP | Peptides PKD3ca | norm.log2.Ratio. filt.LFQ.intensity | Sig. | Putative PKD substrate motifs                                                                                                                                       |
|---------------|-------------------------------------------------------------------------|------------|---------------|-----------------|-------------------------------------|------|---------------------------------------------------------------------------------------------------------------------------------------------------------------------|
|               | RNF213                                                                  |            |               |                 |                                     |      | LdRifS511<br>LfRtwT1602<br>LrRciT1845<br>IIRleS2501<br>VIRnfS2949<br>LyRkvS3210<br>LsRmgS3384<br>LIRdaS4057<br>LvRklS4233<br>LtRIIT4537<br>LIRvqS4605<br>IqRqiS4908 |
| Q8CD15        | Bifunctional lysine-specific demethylase and histidyl-hydroxylase MINA  | Mina       | 2             | 9               | 1,90                                | 1    | VcRsiS107<br>VtRklS309                                                                                                                                              |
| Q99L45        | Eukaryotic translation initiation factor 2 subunit 2                    | Eif2s2     | 4             | 16              | 1,89                                | 1    | VvRvgT212                                                                                                                                                           |
| Q3TGW2        | Endonuclease/exonuclease/phosphatase family domain-containing protein 1 | Eepd1      | 3             | 8               | 1,87                                | 1    | IpRdpS16<br>VfRlaT265                                                                                                                                               |
| Q8R0X7        | Sphingosine-1-phosphate lyase 1                                         | Sgpl1      | 2             | 14              | 1,87                                | 1    |                                                                                                                                                                     |
| P97449        | Aminopeptidase N                                                        | Anpep      | 12            | 28              | 1,87                                | 1    | ViRmlS487<br>VnRppT745<br>LnRylS845<br>VtRrfS909                                                                                                                    |
| P19157        | Glutathione S-transferase P 1                                           | Gstp1      | 2             | 7               | 1,86                                | 1    |                                                                                                                                                                     |
| Q6R0H7        | Guanine nucleotide-binding protein G(s) subunit alpha isoforms XLas     | Gnas       | 5             | 15              | 1,84                                | 1    | LpRshT699                                                                                                                                                           |
| Q640L3        | Cell cycle progression protein 1                                        | Ccpg1      | 2             | 3               | 1,82                                | 1    | LeRcwT286                                                                                                                                                           |
| P80318        | T-complex protein 1 subunit gamma                                       | Cct3       | 6             | 25              | 1,81                                | 1    | IsRwsS170<br>LIRgaS380                                                                                                                                              |
| P49813        | Tropomodulin-1                                                          | Tmod1      | 2             | 11              | 1,80                                | 1    |                                                                                                                                                                     |
| Q8JZQ9        | Eukaryotic translation initiation factor 3 subunit B                    | Eif3b      | 2             | 5               | 1,77                                | 1    | VeRrrT741                                                                                                                                                           |
| O70589        | Peripheral plasma membrane protein CASK                                 | Cask       | 1             | 5               | 1,75                                | 1    | LkReaS64<br>LkRilT433<br>IhRqgT539                                                                                                                                  |
| Q9CPR4        | 60S ribosomal protein L17                                               | Rpl17      | 3             | 15              | 1,75                                | 1    |                                                                                                                                                                     |
| P09411        | Phosphoglycerate kinase 1                                               | Pgk1       | 3             | 10              | 1,74                                | 1    |                                                                                                                                                                     |
| O09167        | 60S ribosomal protein L21                                               | Rpl21      | 6             | 7               | 1,71                                | 1    |                                                                                                                                                                     |
| Q69ZX8        | Actin-binding LIM protein 3                                             | Ablim3     | 3             | 11              | 1,67                                | 1    | LhRtpS598<br>LeRhIS649                                                                                                                                              |
| P10126        | Elongation factor 1-alpha 1                                             | Eef1a1     | 6             | 15              | 1,67                                | 1    | VgRveT269                                                                                                                                                           |
| Q80TP3        | E3 ubiquitin-protein ligase UBR5                                        | Ubr5       | 8             | 29              | 1,66                                | 1    | LsRlgS293<br>LyRIIT1254<br>LrRsgT1751<br>LaRayS1783                                                                                                                 |

| Uniprot entry | Protein names                                 | Gene names | Peptides EGFP | Peptides PKD3ca | norm.log2.Ratio. filt.LFQ.intensity | Sig. | Putative PKD substrate motifs                                                                                       |
|---------------|-----------------------------------------------|------------|---------------|-----------------|-------------------------------------|------|---------------------------------------------------------------------------------------------------------------------|
|               |                                               |            |               |                 |                                     |      | ViRqjS1790<br>LeRkrT1971                                                                                            |
| P11983        | T-complex protein 1 subunit alpha             | Tcp1       | 6             | 18              | 1,63                                | 1    |                                                                                                                     |
| Q0P678        | Zinc finger CCCH domain-containing protein 18 | Zc3h18     | 3             | 4               | 1,62                                | 1    |                                                                                                                     |
| Q9DB20        | ATP synthase subunit O, mitochondrial         | Atp5o      | 2             | 7               | 1,60                                | 1    |                                                                                                                     |
| Q3UQ44        | Ras GTPase-activating-like protein IQGAP2     | Iqgap2     | 3             | 14              | 1,59                                | 1    | LdRkqS554<br>LkRknS1458                                                                                             |
| P62082        | 40S ribosomal protein S7                      | Rps7       | 4             | 14              | 1,53                                | 1    |                                                                                                                     |
| P63037        | DnaJ homolog subfamily A member 1             | Dnaja1     | 3             | 11              | 1,52                                | 1    |                                                                                                                     |
| Q64339        | Ubiquitin-like protein ISG15                  | Isg15      | 4             | 6               | 1,50                                | 1    |                                                                                                                     |
| Q91YD6        | Villin-like protein                           | Vill       | 7             | 14              | 1,49                                | 1    |                                                                                                                     |
| Q99K51        | Plastin-3                                     | Pls3       | 8             | 18              | 1,48                                | 1    | LkRaeS339<br>LmRryT506<br>VnRtlS533                                                                                 |
| P17225        | Polypyrimidine tract-binding protein 1        | Ptbp1      | 5             | 14              | 1,48                                | 1    |                                                                                                                     |
| P06151        | L-lactate dehydrogenase A chain               | Ldha       | 4             | 10              | 1,48                                | 1    |                                                                                                                     |
| Q62191        | E3 ubiquitin-protein ligase TRIM21            | Trim21     | 6             | 17              | 1,46                                | 1    | LeRsgS260                                                                                                           |
| O08749        | Dihydrolipoyl dehydrogenase, mitochondrial    | Dld        | 2             | 9               | 1,46                                | 1    |                                                                                                                     |
| P26041        | Moesin                                        | Msn        | 8             | 21              | 1,45                                | 1    |                                                                                                                     |
| Q8VI94        | 2-5-oligoadenylate synthase-like protein 1    | Oasl1      | 8             | 20              | 1,45                                | 1    | VIRstT80                                                                                                            |
| Q4U2R1        | E3 ubiquitin-protein ligase HERC2             | Herc2      | 22            | 54              | 1,42                                | 1    | VyRakS97<br>LaRvgS198<br>LqRfqS347<br>LdRlaT406<br>LgRggS643<br>LlRqvS811<br>VaRriS1036<br>LlResT2123<br>LkRchS2773 |

| Uniprot entry | Protein names                 | Gene names | Peptides EGFP | Peptides PKD3ca | norm.log2.Ratio. filt.LFQ.intensity | Sig. | Putative PKD substrate motifs                                                                                |
|---------------|-------------------------------|------------|---------------|-----------------|-------------------------------------|------|--------------------------------------------------------------------------------------------------------------|
|               |                               |            |               |                 |                                     |      | LiRkkT2949<br>IpRqiT3041<br>LgRggS3191<br>VnRkpT3302<br>VnRivS3668<br>LrRIIT3785<br>LgRggS4184<br>VkRsrS4432 |
| P62858        | 40S ribosomal protein S28     | Rps28      | 2             | 3               | 1,40                                | 1    | LgRtgS23                                                                                                     |
| Q99KP6        | Pre-mRNA-processing factor 19 | Prpf19     | 2             | 11              | 1,36                                | 1    |                                                                                                              |
| P46735        | Unconventional myosin-Ib      | Myo1b      | 78            | 83              | 1,34                                | 1    | LeRdfS230<br>LeRafS325<br>LyRdlS539<br>LkRppT569                                                             |
| ...           |                               |            |               |                 |                                     |      |                                                                                                              |
| Q9EP53        | Hamartin                      | Tsc1       | 6             | 16              | 0,71                                | 0    | LfRnkS1094                                                                                                   |
